# Supplementary material for: MGIT-seq for the Identification of Nontuberculous Mycobacteria and Drug Resistance: a Prospective Study
Source: PubMed Central journal article supplement (PMC10117113; doi:10.1128/jcm.01626-22), 2023-03-22
Supplement: jcm.01626-22-s0001.pdf [file jcm.01626-22-s0001.pdf]

Supporting Online Material for

**MGIT-seq for the Identification of  
Nontuberculous Mycobacteria and Drug  
Resistance: A prospective study**

Kiyoharu Fukushima, Yuki Matsumoto, Takanori Matsuki,  
Haruko Saito, Daisuke Motooka, Sho Komukai, Eriko Fukui,  
June Yamuchi, Tadayoshi Nitta, Takayuki Niitsu, Yuko Abe,  
Hiroshi Nabeshima, Yasuharu Nagahama, Takuro Nii,  
Kazuyuki Tsujino, Keisuke Miki, Seigo Kitada, Atsushi  
Kumanogoh, Shizuo Akirac, Shota Nakamura & Hiroshi Kida

This PDF file includes

Supplementary Methods

Figures. S1 to S4

Tables. S1 to S7

## **Supplementary Methods**

### **Sample size calculation**

The optimal sample size of this study was calculated as follows (1): 100% species level identification is expected using the MGIT-seq, and the performance of the standard clinical protocol is assumed to be 90% (2-4). When two methods are applied to each sample, the rate of identification by MGIT-seq alone and not by the standard clinical protocol is set to 10%, whereas the rate of identification by the standard clinical protocol alone is set to 0.5%. Therefore, assuming a type 1 error of 0.05 and a power of 80%, the required number of cases was 118. Considering the possibility of a 10% dropout, the required sample size for this study was 132.

### **TRC**

*M. tuberculosis*, *M. avium*, and *M. intracellulare* were differentiated by TRCReady-80 (Tosoh Bioscience, Tokyo, Japan) based on the TRC, which identified each species.

## **MALDI-TOF MS**

Identification of NTM species by MALDI-TOF MS was performed in LSI Medience Corporation (Tokyo, Japan). Positive MGIT broths were subcultured on 7H11 agar medium for 3–7 days. Isolated colonies were transferred into 300  $\mu$ L deionized water using a 1- $\mu$ L inoculation loop, and mixed thoroughly. Following heat inactivation at 95°C for 30 min, 900  $\mu$ L absolute ethanol was added. After centrifugation, the supernatant was removed completely and the pellet was air-dried. Silica beads (0.5 mm diameter) and 20  $\mu$ L acetonitrile were added to the reaction tube, which was mixed using a vortex mixer for 5 min. Twenty microliters of 70% formic acid was added and mixed well in the tube. After centrifugation, 1  $\mu$ L supernatant was transferred to a MALDI target plate. Once the sample was dry, 1  $\mu$ L Bruker HCCA Matrix Solution (Bruker Daltonics GmbH & Co. KG) was applied. Measurement was performed by MALDI Biotyper system with MBT Compass software. The Bruker bacterial test standard was used for calibration. Identification was performed by MALDI Biotyper system. Spectra were acquired using microflex LT/SH with flexControl version 3.4 and MBT Compass version 4.1 with Mycobacteria module. Mycobacteria library 5.0 containing 912 MSPs was used for bacterial identification. Any samples that did not generate a spectrum were re-extracted. Using the Mycobacteria module, the threshold score for high confidence identification was  $\geq 1.8$ ,

and a score of 1.6–1.8 was considered to be low confidence identification. A score <1.6 indicated no reliable identification. Unidentified NTM species by MALDI-TOF MS were further analyzed by the AccuProbe (Gen-Probe Inc., San Diego, CA, USA).

### **Multiplex PCR- and chromatographic-detection-based identification**

*M. abscessus* subsp. *Abscessus/bolletii* and *M. abscessus* subsp. *massiliense* were differentiated by Kaneka Nucleic Acid Chromatography Rapidly Growing Mycobacteria (RGM) Identification Kit, which is based on multiplex PCR and chromatographic detection (Kaneka, Hyogo, Japan).

### **Drug susceptibility testing**

Drug susceptibility tests for CLR were performed after MAC and *M. abscessus* were isolated. Macrolide susceptibility was determined through broth microdilution for CLR, BrothMIC NTM for MAC, and BrothMIC RGM for *M. abscessus* (Kyokuto Pharmaceutical Industrial Co. Ltd.). After confirming adequate growth of the control over 7 days of incubation in a standard atmosphere at 35°C in MAC,

and 3 and 14 days of incubation (for detection of both acquired and inducible resistance) in a standard atmosphere at 30°C in *M. abscessus*, we determined the MIC. Drug susceptibility tests for AMK were performed using the broth microdilution method according to Clinical and Laboratory Standards Institute M24-3 guidelines (5). The culture was transferred to Middlebrook 7H9 broth and vortexed. We adjusted the culture medium to a 0.5 McFarland standard with sterile distilled water; thereafter, we added 60 µL of the 0.5 McFarland suspension to a 12mL of Cation-Adjusted Mueller-Hinton Broth (Kyokuto Pharmaceutical Industrial Co. Ltd., <https://www.kyokutoseiyaku.co.jp>) with (slowly growing mycobacteria) and without (rapidly growing mycobacteria) 5% OADC enrichment and dispensed 100 µL of this solution into each well of the panel. After confirming adequate growth of the control over 7 days of incubation in a standard atmosphere at 35°C in slowly growing mycobacteria and 3 days of incubation in a standard atmosphere at 30°C in rapidly growing mycobacteria, we determined the MIC.

### **Calculation and species identification using average nucleotide identity (ANI) value**

The sequencing reads were assembled using flye 2.9 with default options. The assembled sequences were evaluated for the average

nucleotide identity (ANI) using FastANI with “--fragLen 1000” option against 404 assemblies of Mycobacterium comprising 214 identified spp., 13 sub-spp., and 177 not identified spp.

### **Accuracy of mutation detection by MGIT-seq**

The raw sequencing reads of No. 52 were assembled using flye 2.9 and draft genome was corrected by racon 1.4.2 and medaka 1.5.0. To generate the data for correction, we randomly sampled subset sequences of 5, 10, 15, 20, 25, 50, 100, 150, 200, 400 Mb of sequencing data from the raw sequencing reads. These amounts were corresponding to 1X, 2X, 3X, 4X, 5X, 10X, 20X, 30X, 40X, 80X coverage of 5 Mb, typical size of bacterial genome, respectively. The sampled sequences were mapped to the draft genome using minimap2 2.17, and variant call was performed using bcftools and samtools 1.11 with default parameters. The percent identity to the reference sequence was calculated using blastn 2.9.0.

### **Costs for MGIT-seq**

The cost per sample for MinION sequence was calculated by taking into account flow cell costs, library preparation and sequencing kits, and also includes all other costs per sample preparation and sequencing

### **Supplementary references (1-5)**

1. Connor RJ. 1987. Sample size for testing differences in proportions for the paired-sample design. *Biometrics* 43:207-11.
2. Cao Y, Wang L, Ma P, Fan W, Gu B, Ju S. 2018. Accuracy of matrix-assisted laser desorption ionization-time of flight mass spectrometry for identification of mycobacteria: a systematic review and meta-analysis. *Sci Rep* 8:4131.
3. Yoshida M, Sano S, Chien JY, Fukano H, Suzuki M, Asakura T, Morimoto K, Murase Y, Miyamoto S, Kurashima A, Hasegawa N, Hsueh PR, Mitarai S, Ato M, Hoshino Y. 2021. A novel DNA chromatography method to discriminate *Mycobacterium abscessus* subspecies and macrolide susceptibility. *EBioMedicine* 64:103187.
4. Hida Y, Hisada K, Shimada A, Yamashita M, Kimura H, Yoshida H, Iwasaki H, Iwano M. 2012. Rapid detection of the *Mycobacterium tuberculosis* complex by use of quenching probe PCR (geneCube). *J Clin Microbiol* 50:3604-8.

5. Woods GL. 2018. Performance standards for susceptibility testing of mycobacteria, *Nocardia* spp, and other aerobic actinomycetes, 1st ed CLSI document no M62. Clinical and Laboratory Standards Institute, Wayne (PA).



## Supplementary Figures

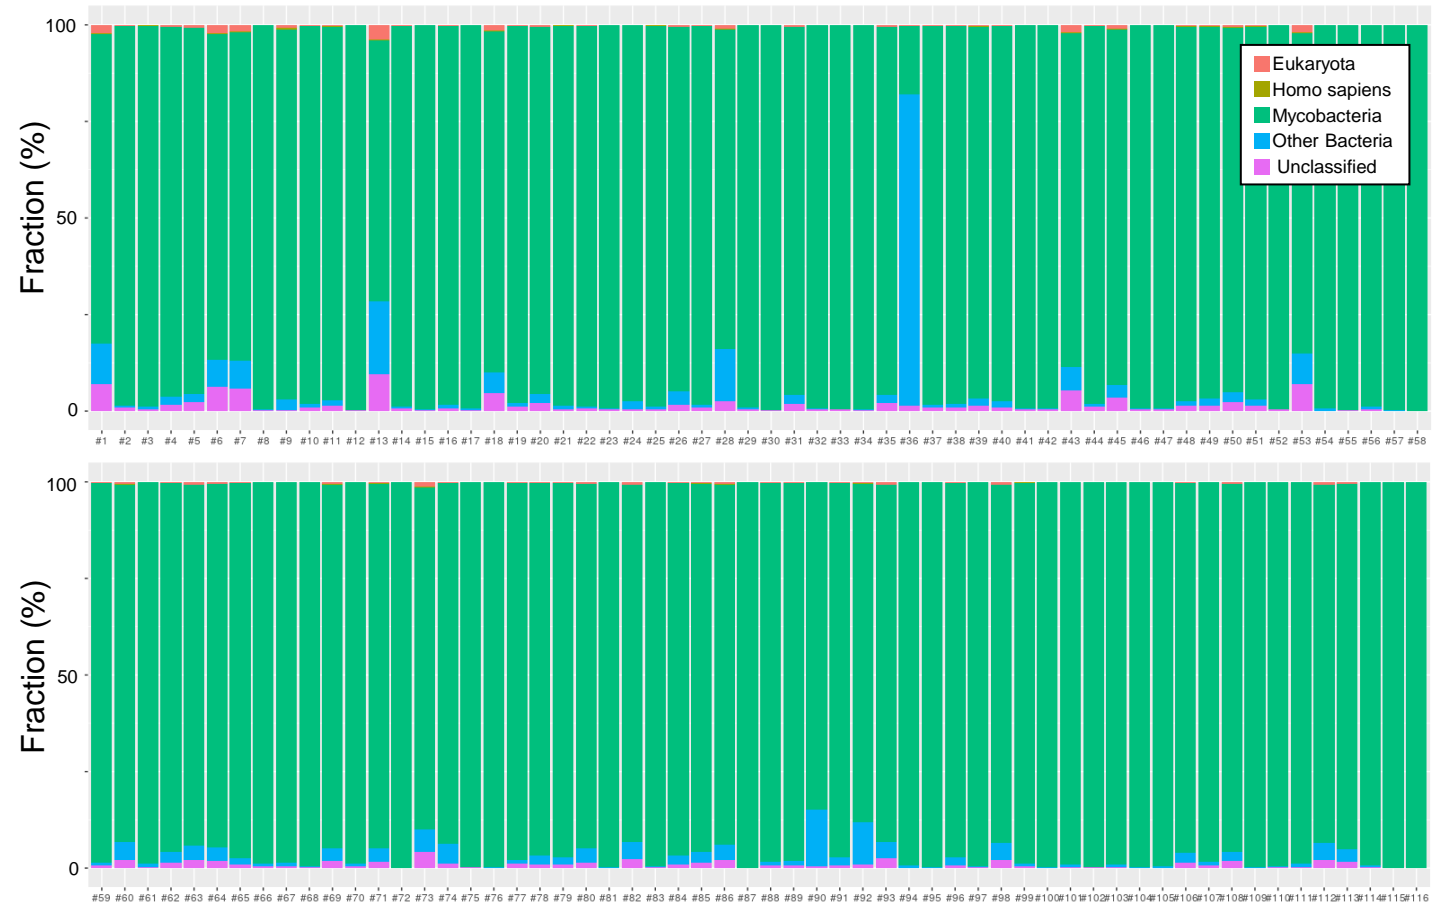

Fig S1. Metagenomics of direct MGIT sequence. Microbiome composition of each sample.

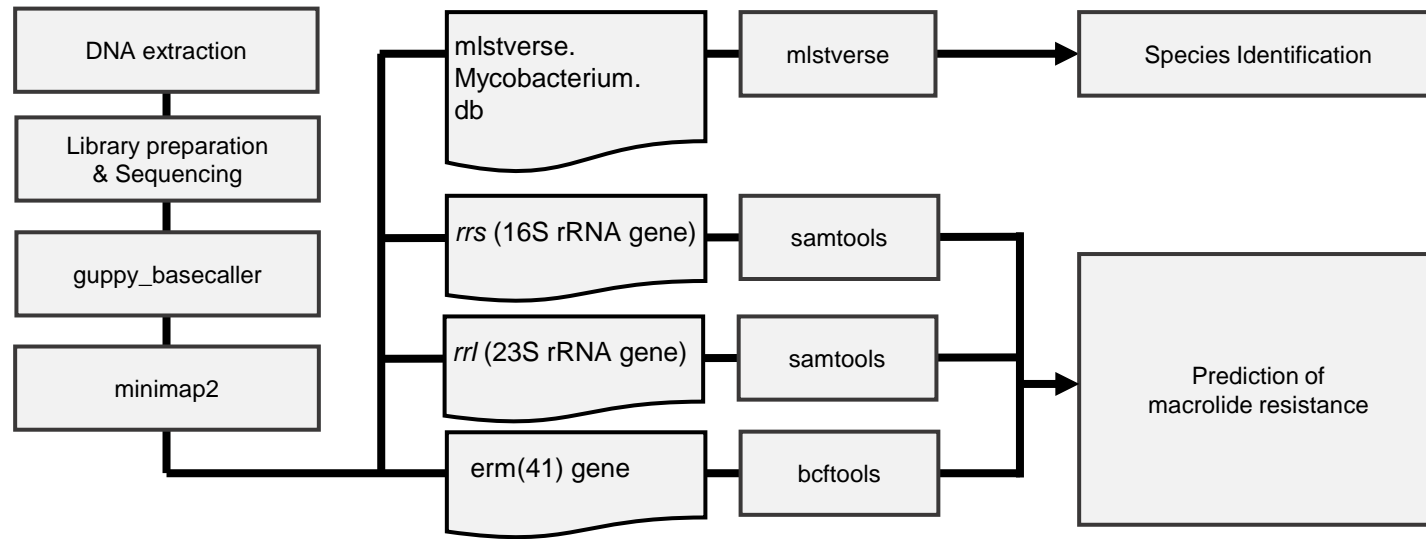

Fig S2. The workflow of sequence analysis.

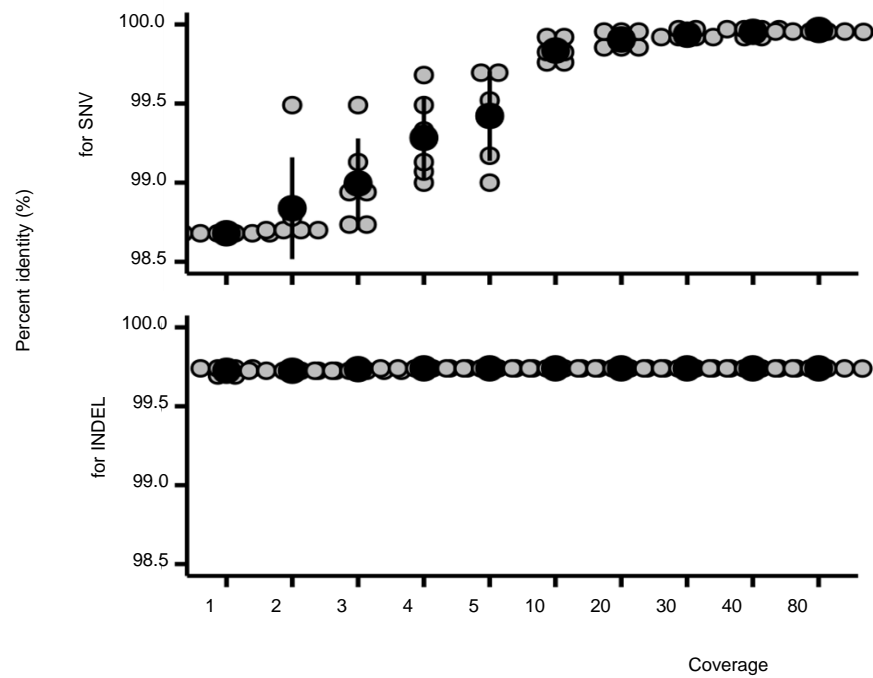

Fig S3. The validity of sequence accuracy of direct MGIT sequence. The percent identity for SNV (top) and INDEL (bottom) were shown with random sampling data (n=6, each; gray) and their average (black). Error bar indicates sd of random sampling.

A

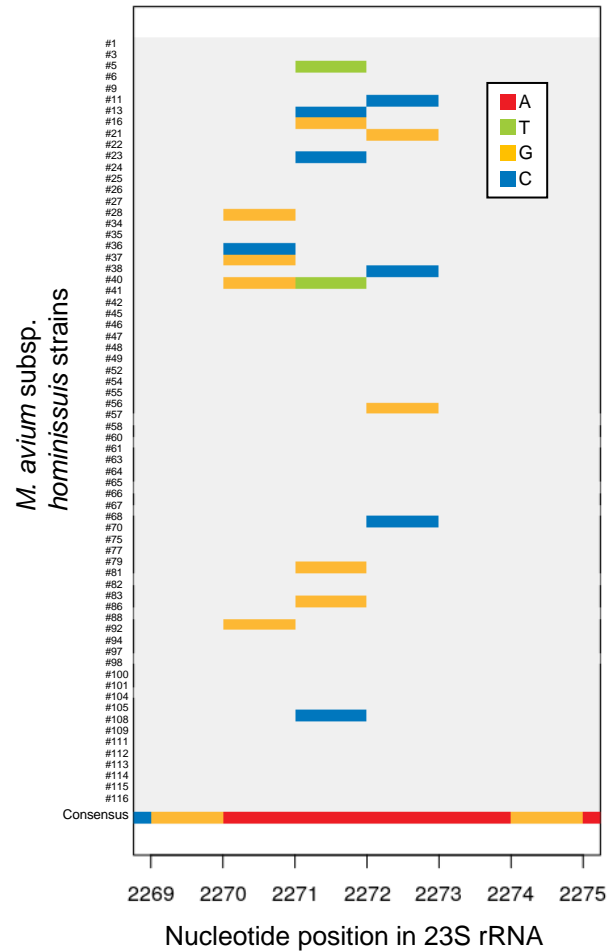

B

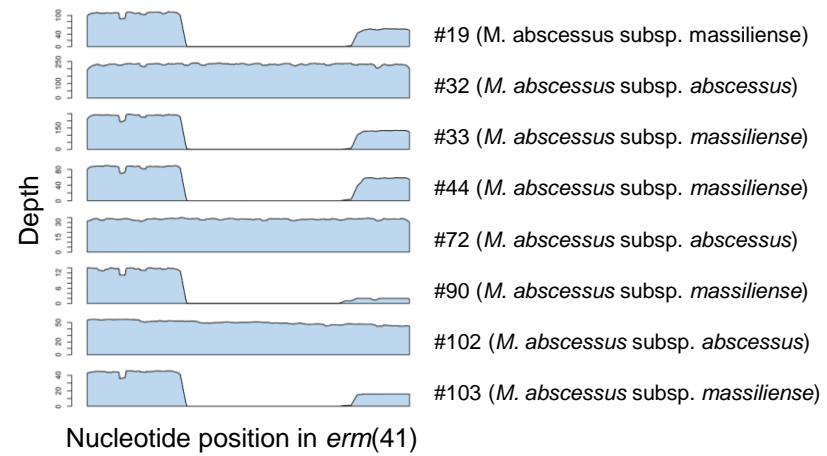

Fig S4. The species identification and drug resistance prediction. A) Macrolide resistance prediction on *rrl* gene. Sixty eight strains of *M. avium* subsp. *hominissuis* were shown. The view of 2269-2275 nucleotide positions in *M. avium* subsp. *hominissuis* (corresponding to 2056-2062 in *E. coli* numbering) were shown. The filled color on each bases indicates the mutation from the consensus base to A (red), to T (green), to G (yellow), and to C (blue), respectively. B) Visualization of *erm(41)* gene status. The depth on each nucleotide position of *erm(41)* gene were shown. *M. avium*, *mycobacterium avium*; subsp, subspecies.

## Supplementary Tables

Table S1. Full identification results by different identification methods.

| No | TRC<br>species           | MALDI-TOF MS<br>species  | Multiplex PCR and<br>chromatographic detection<br>species and subspecies | <i>MLST</i> verse<br>species and subspecies              |
|----|--------------------------|--------------------------|--------------------------------------------------------------------------|----------------------------------------------------------|
| 1  | <i>M. avium</i>          | <i>M. avium</i>          |                                                                          | <i>M. avium</i> subsp. <i>hominissuis</i>                |
| 2  | <i>M. intracellulare</i> | <i>M. intracellulare</i> |                                                                          | <i>M. intracellulare</i> subsp.<br><i>intracellulare</i> |
| 3  | <i>M. avium</i>          | <i>M. avium</i>          |                                                                          | <i>M. avium</i> subsp. <i>hominissuis</i>                |
| 4  | <i>M. intracellulare</i> | <i>M. intracellulare</i> |                                                                          | <i>M. intracellulare</i> subsp.<br><i>intracellulare</i> |
| 5  | <i>M. avium</i>          | <i>M. avium</i>          |                                                                          | <i>M. avium</i> subsp. <i>hominissuis</i>                |
| 6  | <i>M. avium</i>          | <i>M. avium</i>          |                                                                          | <i>M. avium</i> subsp. <i>hominissuis</i>                |
| 7  | <i>M. intracellulare</i> | <i>M. intracellulare</i> |                                                                          | <i>M. intracellulare</i> subsp.<br><i>intracellulare</i> |
| 8  | <i>M. intracellulare</i> | <i>M. intracellulare</i> |                                                                          | <i>M. intracellulare</i> subsp. <i>chimaera</i>          |
| 9  | <i>M. avium</i>          | <i>M. avium</i>          |                                                                          | <i>M. avium</i> subsp. <i>hominissuis</i>                |
| 10 | <i>M. intracellulare</i> | <i>M. intracellulare</i> |                                                                          | <i>M. intracellulare</i> subsp. <i>chimaera</i>          |
| 11 | <i>M. avium</i>          | <i>M. avium</i>          |                                                                          | <i>M. avium</i> subsp. <i>hominissuis</i>                |
| 12 | <i>M. intracellulare</i> | <i>M. intracellulare</i> |                                                                          | <i>M. intracellulare</i> subsp.<br><i>intracellulare</i> |
| 13 | <i>M. avium</i>          | <i>M. avium</i>          |                                                                          | <i>M. avium</i> subsp. <i>hominissuis</i>                |
| 14 | <i>M. intracellulare</i> | <i>M. intracellulare</i> |                                                                          | <i>M. intracellulare</i> subsp.<br><i>intracellulare</i> |
| 15 | <i>M. intracellulare</i> | <i>M. intracellulare</i> |                                                                          | <i>M. intracellulare</i> subsp.<br><i>intracellulare</i> |

|    |                          |                          |                              |                                                       |
|----|--------------------------|--------------------------|------------------------------|-------------------------------------------------------|
| 16 | <i>M. avium</i>          | <i>M. avium</i>          |                              | <i>M. avium</i> subsp. <i>hominissuis</i>             |
| 17 |                          | <i>M. kansasii</i>       |                              | <i>M. kansasii</i>                                    |
| 18 |                          | <i>M.lentiflavum</i>     |                              | <i>M. lentiflavum</i>                                 |
| 19 |                          | <i>M. abscessus</i>      | <i>M. massiliense</i>        | <i>M. abscessus</i> subsp. <i>massiliense</i>         |
| 20 | <i>M. intracellulare</i> | <i>M. intracellulare</i> |                              | <i>M. intracellulare</i> subsp. <i>intracellulare</i> |
| 21 | <i>M. avium</i>          | <i>M. avium</i>          |                              | <i>M. avium</i> subsp. <i>hominissuis</i>             |
| 22 | <i>M. avium</i>          | <i>M. avium</i>          |                              | <i>M. avium</i> subsp. <i>hominissuis</i>             |
| 23 | <i>M. avium</i>          | <i>M. avium</i>          |                              | <i>M. avium</i> subsp. <i>hominissuis</i>             |
| 24 | <i>M. avium</i>          | <i>M. avium</i>          |                              | <i>M. avium</i> subsp. <i>hominissuis</i>             |
| 25 | <i>M. avium</i>          | <i>M. avium</i>          |                              | <i>M. avium</i> subsp. <i>hominissuis</i>             |
| 26 | <i>M. avium</i>          | <i>M. avium</i>          |                              | <i>M. avium</i> subsp. <i>hominissuis</i>             |
| 27 | <i>M. avium</i>          | <i>M. avium</i>          |                              | <i>M. avium</i> subsp. <i>hominissuis</i>             |
| 28 | <i>M. avium</i>          | <i>M. avium</i>          |                              | <i>M. avium</i> subsp. <i>hominissuis</i>             |
| 29 | <i>M. intracellulare</i> | <i>M. intracellulare</i> |                              | <i>M. intracellulare</i> subsp. <i>intracellulare</i> |
| 30 | <i>M. intracellulare</i> | <i>M. intracellulare</i> |                              | <i>M. intracellulare</i> subsp. <i>intracellulare</i> |
| 31 | <i>M. intracellulare</i> | <i>M. intracellulare</i> |                              | <i>M. intracellulare</i> subsp. <i>intracellulare</i> |
| 32 |                          | <i>M. abscessus</i>      | <i>M. abscessus/bolletii</i> | <i>M. abscessus</i> subsp. <i>abscessus</i>           |
| 33 |                          | <i>M. abscessus</i>      | <i>M. massiliense</i>        | <i>M. abscessus</i> subsp. <i>massiliense</i>         |
| 34 | <i>M. avium</i>          | <i>M. avium</i>          |                              | <i>M. avium</i> subsp. <i>hominissuis</i>             |
| 35 | <i>M. avium</i>          | <i>M. avium</i>          |                              | <i>M. avium</i> subsp. <i>hominissuis</i>             |

|    |                          |                          |                       |                                                       |
|----|--------------------------|--------------------------|-----------------------|-------------------------------------------------------|
| 36 | <i>M. avium</i>          | <i>M. avium</i>          |                       | <i>M. avium</i> subsp. <i>hominissuis</i>             |
| 37 | <i>M. avium</i>          | <i>M. avium</i>          |                       | <i>M. avium</i> subsp. <i>hominissuis</i>             |
| 38 | <i>M. avium</i>          | <i>M. avium</i>          |                       | <i>M. avium</i> subsp. <i>hominissuis</i>             |
| 39 | <i>M. intracellulare</i> | <i>M. intracellulare</i> |                       | <i>M. intracellulare</i> subsp. <i>intracellulare</i> |
| 40 | <i>M. avium</i>          | <i>M. avium</i>          |                       | <i>M. avium</i> subsp. <i>hominissuis</i>             |
| 41 | <i>M. avium</i>          | <i>M. avium</i>          |                       | <i>M. avium</i> subsp. <i>hominissuis</i>             |
| 42 | <i>M. avium</i>          | <i>M. avium</i>          |                       | <i>M. avium</i> subsp. <i>hominissuis</i>             |
| 43 |                          | <i>M. paragordoniae</i>  |                       | <i>M. paragordoniae</i>                               |
| 44 |                          | <i>M. abscessus</i>      | <i>M. massiliense</i> | <i>M. abscessus</i> subsp. <i>massiliense</i>         |
| 45 | <i>M. avium</i>          | <i>M. avium</i>          |                       | <i>M. avium</i> subsp. <i>hominissuis</i>             |
| 46 | <i>M. avium</i>          | <i>M. avium</i>          |                       | <i>M. avium</i> subsp. <i>hominissuis</i>             |
| 47 | <i>M. avium</i>          | <i>M. avium</i>          |                       | <i>M. avium</i> subsp. <i>hominissuis</i>             |
| 48 | <i>M. avium</i>          | <i>M. avium</i>          |                       | <i>M. avium</i> subsp. <i>hominissuis</i>             |
| 49 | <i>M. avium</i>          | <i>M. avium</i>          |                       | <i>M. avium</i> subsp. <i>hominissuis</i>             |
| 50 | <i>M. intracellulare</i> | <i>M. intracellulare</i> |                       | <i>M. intracellulare</i> subsp. <i>intracellulare</i> |
| 51 | <i>M. intracellulare</i> | <i>M. intracellulare</i> |                       | <i>M. intracellulare</i> subsp. <i>intracellulare</i> |
| 52 | <i>M. avium</i>          | <i>M. avium</i>          |                       | <i>M. avium</i> subsp. <i>hominissuis</i>             |
| 53 |                          | Unidentified             |                       | <i>M. gordonae</i>                                    |
| 54 | <i>M. avium</i>          | <i>M. avium</i>          |                       | <i>M. avium</i> subsp. <i>hominissuis</i>             |
| 55 | <i>M. avium</i>          | <i>M. avium</i>          |                       | <i>M. avium</i> subsp. <i>hominissuis</i>             |
| 56 | <i>M. avium</i>          | <i>M. avium</i>          |                       | <i>M. avium</i> subsp. <i>hominissuis</i>             |
| 57 | <i>M. avium</i>          | <i>M. avium</i>          |                       | <i>M. avium</i> subsp. <i>hominissuis</i>             |

|    |                          |                             |                              |                                                       |
|----|--------------------------|-----------------------------|------------------------------|-------------------------------------------------------|
| 58 | <i>M. avium</i>          | <i>M. avium</i>             |                              | <i>M. avium</i> subsp. <i>hominissuis</i>             |
| 59 | <i>M. intracellulare</i> | <i>M. intracellulare</i>    |                              | <i>M. intracellulare</i> subsp. <i>intracellulare</i> |
| 60 | <i>M. avium</i>          | <i>M. avium</i>             |                              | <i>M. avium</i> subsp. <i>hominissuis</i>             |
| 61 | <i>M. avium</i>          | <i>M. avium</i>             |                              | <i>M. avium</i> subsp. <i>hominissuis</i>             |
| 62 |                          | <i>M. lentiflavum</i>       |                              | <i>M. lentiflavum</i>                                 |
| 63 | <i>M. avium</i>          | <i>M. avium</i>             |                              | <i>M. avium</i> subsp. <i>hominissuis</i>             |
| 64 | <i>M. avium</i>          | <i>M. avium</i>             |                              | <i>M. avium</i> subsp. <i>hominissuis</i>             |
| 65 | <i>M. avium</i>          | <i>M. avium</i>             |                              | <i>M. avium</i> subsp. <i>hominissuis</i>             |
| 66 | <i>M. avium</i>          | <i>M. avium</i>             |                              | <i>M. avium</i> subsp. <i>hominissuis</i>             |
| 67 |                          | <i>M. avium</i>             |                              | <i>M. avium</i> subsp. <i>hominissuis</i>             |
| 68 | <i>M. avium</i>          | <i>M. avium</i>             |                              | <i>M. avium</i> subsp. <i>hominissuis</i>             |
| 69 | <i>M. intracellulare</i> | <i>M. fortuitum complex</i> |                              | <i>M. porcinum</i>                                    |
| 70 | <i>M. avium</i>          | <i>M. avium</i>             |                              | <i>M. avium</i> subsp. <i>hominissuis</i>             |
| 71 |                          | Unidentified                |                              | <i>M. szulgai</i>                                     |
| 72 |                          | <i>M. abscessus</i>         | <i>M. abscessus/bolletii</i> | <i>M. abscessus</i> subsp. <i>abscessus</i>           |
| 73 |                          | <i>M. fortuitum complex</i> |                              | <i>M. fortuitum</i> subsp. <i>fortuitum</i>           |
| 74 |                          | <i>M. peregrinum</i>        |                              | <i>M. peregrinum</i>                                  |
| 75 | <i>M. avium</i>          | <i>M. avium</i>             |                              | <i>M. avium</i> subsp. <i>hominissuis</i>             |
| 76 | <i>M. intracellulare</i> | <i>M. intracellulare</i>    |                              | <i>M. intracellulare</i> subsp. <i>intracellulare</i> |
| 77 | <i>M. avium</i>          | <i>M. avium</i>             |                              | <i>M. avium</i> subsp. <i>hominissuis</i>             |
| 78 | <i>M. intracellulare</i> | <i>M. intracellulare</i>    |                              | <i>M. intracellulare</i> subsp. <i>intracellulare</i> |
| 79 | <i>M. avium</i>          | <i>M. avium</i>             |                              | <i>M. avium</i> subsp. <i>hominissuis</i>             |



|    |                          |                          |                              |                                                          |
|----|--------------------------|--------------------------|------------------------------|----------------------------------------------------------|
| 80 | <i>M. intracellulare</i> | <i>M. intracellulare</i> |                              | <i>M. intracellulare</i> subsp.<br><i>intracellulare</i> |
| 81 | <i>M. avium</i>          | <i>M. avium</i>          |                              | <i>M. avium</i> subsp. <i>hominissuis</i>                |
| 82 | <i>M. avium</i>          | <i>M. avium</i>          |                              | <i>M. avium</i> subsp. <i>hominissuis</i>                |
| 83 | <i>M. avium</i>          | <i>M. avium</i>          |                              | <i>M. avium</i> subsp. <i>hominissuis</i>                |
| 84 | <i>M. intracellulare</i> | <i>M. intracellulare</i> |                              | <i>M. intracellulare</i> subsp.<br><i>intracellulare</i> |
| 85 |                          | <i>M. gordonae</i>       |                              | <i>M. paragordonae</i>                                   |
| 86 | <i>M. avium</i>          | <i>M. avium</i>          |                              | <i>M. avium</i> subsp. <i>hominissuis</i>                |
| 87 | <i>M. intracellulare</i> | <i>M. intracellulare</i> |                              | <i>M. intracellulare</i> subsp.<br><i>intracellulare</i> |
| 88 | <i>M. avium</i>          | <i>M. avium</i>          |                              | <i>M. avium</i> subsp. <i>hominissuis</i>                |
| 89 | <i>M. intracellulare</i> | <i>M. intracellulare</i> | <i>M. abscessus/bolletii</i> | <i>M. intracellulare</i> subsp.<br><i>intracellulare</i> |
| 90 |                          | <i>M. abscessus</i>      | <i>M. masillense</i>         | <i>M. abscessus</i> subsp. <i>massiliense</i>            |
| 91 | <i>M. intracellulare</i> | <i>M. intracellulare</i> |                              | <i>M. intracellulare</i> subsp.<br><i>intracellulare</i> |
| 92 | <i>M. avium</i>          | <i>M. avium</i>          |                              | <i>M. avium</i> subsp. <i>hominissuis</i>                |
| 93 |                          | Unidentified             |                              | <i>M. paragordonae</i>                                   |
| 94 | <i>M. avium</i>          | <i>M. avium</i>          |                              | <i>M. avium</i> subsp. <i>hominissuis</i>                |
| 95 | <i>M. intracellulare</i> | <i>M. intracellulare</i> |                              | <i>M. intracellulare</i> subsp.<br><i>intracellulare</i> |
| 96 | <i>M. intracellulare</i> | <i>M. intracellulare</i> |                              | <i>M. intracellulare</i> subsp.<br><i>intracellulare</i> |
| 97 | <i>M. avium</i>          | <i>M. avium</i>          |                              | <i>M. avium</i> subsp. <i>hominissuis</i>                |
| 98 | <i>M. avium</i>          | <i>M. avium</i>          |                              | <i>M. avium</i> subsp. <i>hominissuis</i>                |
| 99 |                          | <i>M. chelonae</i>       |                              | <i>M. chelonae</i>                                       |

|     |                          |                          |                      |                                                          |
|-----|--------------------------|--------------------------|----------------------|----------------------------------------------------------|
| 100 | <i>M. avium</i>          | <i>M. avium</i>          |                      | <i>M. avium</i> subsp. <i>hominissuis</i>                |
| 101 | <i>M. avium</i>          | <i>M. avium</i>          |                      | <i>M. avium</i> subsp. <i>hominissuis</i>                |
| 102 |                          | <i>M. abscessus</i>      |                      | <i>M. abscessus</i> subsp. <i>abscessus</i>              |
| 103 |                          | <i>M. abscessus</i>      | <i>M. masiliense</i> | <i>M. abscessus</i> subsp. <i>masiliense</i>             |
| 104 | <i>M. avium</i>          | <i>M. avium</i>          |                      | <i>M. avium</i> subsp. <i>hominissuis</i>                |
| 105 | <i>M. avium</i>          | <i>M. avium</i>          |                      | <i>M. avium</i> subsp. <i>hominissuis</i>                |
| 106 |                          | <i>M. peregrinum</i>     |                      | <i>M. peregrinum</i>                                     |
| 107 | <i>M. intracellulare</i> | <i>M. intracellulare</i> |                      | <i>M. intracellulare</i> subsp.<br><i>intracellulare</i> |
| 108 | <i>M. avium</i>          | <i>M. avium</i>          |                      | <i>M. avium</i> subsp. <i>hominissuis</i>                |
| 109 | <i>M. avium</i>          | <i>M. avium</i>          |                      | <i>M. avium</i> subsp. <i>hominissuis</i>                |
| 110 | <i>M. intracellulare</i> | <i>M. intracellulare</i> |                      | <i>M. intracellulare</i> subsp.<br><i>intracellulare</i> |
| 111 | <i>M. avium</i>          | <i>M. avium</i>          |                      | <i>M. avium</i> subsp. <i>hominissuis</i>                |
| 112 | <i>M. avium</i>          | <i>M. avium</i>          |                      | <i>M. avium</i> subsp. <i>hominissuis</i>                |
| 113 | <i>M. avium</i>          | <i>M. avium</i>          |                      | <i>M. avium</i> subsp. <i>hominissuis</i>                |
| 114 | <i>M. avium</i>          | <i>M. avium</i>          |                      | <i>M. avium</i> subsp. <i>hominissuis</i>                |
| 115 | <i>M. avium</i>          | <i>M. avium</i>          |                      | <i>M. avium</i> subsp. <i>hominissuis</i>                |
| 116 | <i>M. avium</i>          | <i>M. avium</i>          |                      | <i>M. avium</i> subsp. <i>hominissuis</i>                |

---

TRC, transcription-reverse transcription concerted reaction; MALDI-TOF MS, Matrix-assisted laser desorption ionization-time of flight mass spectrometry; PCR, polymerase chain reaction; *M. avium*, *mycobacterium avium*; subsp, subspecies.

Table S2. Data yields of MGIT sequences.

| No. | BioSample<br>Accession | DRA<br>Accession | Sequencing data   |                     |                  |                     |
|-----|------------------------|------------------|-------------------|---------------------|------------------|---------------------|
|     |                        |                  | Total length (bp) | Minimum length (bp) | Mean length (bp) | Maximum length (bp) |
| 1   | SAMD00439156           | DRX326587        | 1379445652        | 115                 | 3877.6           | 17009               |
| 2   | SAMD00439157           | DRX326588        | 1183838471        | 136                 | 3851.3           | 15889               |
| 3   | SAMD00439158           | DRX326589        | 1200498471        | 126                 | 4238.6           | 15087               |
| 4   | SAMD00439159           | DRX326590        | 1503371099        | 106                 | 3818.3           | 14976               |
| 5   | SAMD00439160           | DRX326591        | 1299444581        | 116                 | 3375.8           | 17084               |
| 6   | SAMD00439161           | DRX326592        | 992770021         | 132                 | 3711.4           | 16875               |
| 7   | SAMD00439162           | DRX326593        | 1317896803        | 133                 | 3669.5           | 17632               |
| 8   | SAMD00439163           | DRX326594        | 956354734         | 107                 | 3650.6           | 14971               |
| 9   | SAMD00439164           | DRX326595        | 800077167         | 135                 | 3845.4           | 14482               |
| 10  | SAMD00439165           | DRX326596        | 1323810361        | 129                 | 4059.8           | 19939               |
| 11  | SAMD00439166           | DRX326597        | 1066823604        | 134                 | 3805.5           | 16300               |
| 12  | SAMD00439167           | DRX326598        | 1239724983        | 110                 | 3716.3           | 19978               |
| 13  | SAMD00439168           | DRX326599        | 229480759         | 134                 | 3372.3           | 13813               |
| 14  | SAMD00439169           | DRX326600        | 928125280         | 131                 | 3437.7           | 15554               |
| 15  | SAMD00439170           | DRX326601        | 1047031984        | 137                 | 3800.6           | 16265               |
| 16  | SAMD00439171           | DRX326602        | 1167334664        | 96                  | 3769.9           | 14944               |
| 17  | SAMD00439172           | DRX326603        | 1148472749        | 129                 | 3821.7           | 17077               |
| 18  | SAMD00439173           | DRX326604        | 976344608         | 97                  | 4517.9           | 17943               |
| 19  | SAMD00439174           | DRX326605        | 1587223096        | 114                 | 4643.2           | 15271               |
| 20  | SAMD00439175           | DRX326606        | 319526749         | 123                 | 3820.8           | 18184               |
| 21  | SAMD00439176           | DRX326607        | 757293399         | 140                 | 3827             | 21019               |

|    |              |           |            |     |        |       |
|----|--------------|-----------|------------|-----|--------|-------|
| 22 | SAMD00439177 | DRX326608 | 938978688  | 120 | 3779.5 | 17809 |
| 23 | SAMD00439178 | DRX326609 | 811807286  | 120 | 3619   | 16627 |
| 24 | SAMD00439179 | DRX326610 | 957081431  | 136 | 3697.2 | 15663 |
| 25 | SAMD00439180 | DRX326611 | 376356736  | 130 | 3694.4 | 14371 |
| 26 | SAMD00439181 | DRX326612 | 261965123  | 116 | 3257   | 18781 |
| 27 | SAMD00439182 | DRX326613 | 271625377  | 150 | 3430.5 | 18355 |
| 28 | SAMD00439183 | DRX326614 | 901895250  | 138 | 3778.4 | 14209 |
| 29 | SAMD00439184 | DRX326615 | 1469055292 | 132 | 3888.9 | 15846 |
| 30 | SAMD00439185 | DRX326616 | 1473239748 | 135 | 4279.9 | 19117 |
| 31 | SAMD00439186 | DRX326617 | 1248405874 | 95  | 4003.4 | 20143 |
| 32 | SAMD00439187 | DRX326618 | 1023938864 | 121 | 4818.3 | 16992 |
| 33 | SAMD00439188 | DRX326619 | 1082227265 | 119 | 3844   | 15341 |
| 34 | SAMD00439189 | DRX326620 | 1718569071 | 119 | 3691.8 | 14216 |
| 35 | SAMD00439190 | DRX326621 | 1983725397 | 110 | 3654.7 | 17816 |
| 36 | SAMD00439191 | DRX326622 | 1450617935 | 120 | 4205.4 | 16049 |
| 37 | SAMD00439192 | DRX326623 | 1255392074 | 111 | 4504.3 | 17979 |
| 38 | SAMD00439193 | DRX326624 | 1351768155 | 119 | 4102.1 | 18415 |
| 39 | SAMD00439194 | DRX326625 | 1561113896 | 120 | 4253.1 | 14844 |
| 40 | SAMD00439195 | DRX326626 | 87883840   | 125 | 3962.5 | 13634 |
| 41 | SAMD00439196 | DRX326627 | 773680753  | 113 | 3523.4 | 15631 |
| 42 | SAMD00439197 | DRX326628 | 294857625  | 123 | 3416.7 | 19571 |
| 43 | SAMD00439198 | DRX326629 | 1131894374 | 102 | 4052   | 15219 |
| 44 | SAMD00439199 | DRX326630 | 2826623143 | 112 | 3671.6 | 16927 |

|    |              |           |            |     |        |        |
|----|--------------|-----------|------------|-----|--------|--------|
| 45 | SAMD00439200 | DRX326631 | 1761544879 | 102 | 3971.8 | 15604  |
| 46 | SAMD00439201 | DRX326632 | 1260932688 | 109 | 4055.9 | 14056  |
| 47 | SAMD00439202 | DRX326633 | 1232212083 | 112 | 4115.7 | 18065  |
| 48 | SAMD00439203 | DRX326634 | 1084736367 | 88  | 4322.7 | 15485  |
| 49 | SAMD00439204 | DRX326635 | 269137843  | 136 | 3646.3 | 16168  |
| 50 | SAMD00439205 | DRX326636 | 1851744221 | 112 | 3751.7 | 23485  |
| 51 | SAMD00439206 | DRX326637 | 1830126149 | 110 | 3913.8 | 16957  |
| 52 | SAMD00439207 | DRX326638 | 1848757978 | 105 | 3787.1 | 14998  |
| 53 | SAMD00439208 | DRX326639 | 2115250083 | 106 | 4010.7 | 20031  |
| 54 | SAMD00514954 | DRX381021 | 1104379408 | 50  | 4274.4 | 103586 |
| 55 | SAMD00514955 | DRX381022 | 1723567831 | 27  | 3484.6 | 99991  |
| 56 | SAMD00514956 | DRX381023 | 1151099911 | 38  | 4081.6 | 124817 |
| 57 | SAMD00514957 | DRX381024 | 1321094465 | 36  | 3848   | 64398  |
| 58 | SAMD00514958 | DRX381025 | 1104261416 | 54  | 4447   | 111676 |
| 59 | SAMD00514959 | DRX381026 | 1371315996 | 39  | 3481.3 | 15435  |
| 60 | SAMD00514960 | DRX381027 | 1049420519 | 44  | 4229.1 | 17370  |
| 61 | SAMD00514961 | DRX381028 | 825265882  | 50  | 4349   | 63574  |
| 62 | SAMD00514962 | DRX381029 | 1117995547 | 61  | 4600.2 | 111233 |
| 63 | SAMD00514963 | DRX381030 | 1215273788 | 55  | 3566.5 | 26188  |
| 64 | SAMD00514964 | DRX381031 | 1155317487 | 27  | 4115.2 | 18215  |
| 65 | SAMD00514965 | DRX381032 | 1254515168 | 26  | 3974.3 | 15782  |
| 66 | SAMD00514966 | DRX381033 | 1150374049 | 53  | 4115   | 15006  |
| 67 | SAMD00514967 | DRX381034 | 1273822158 | 40  | 3835.9 | 42233  |

|    |              |           |            |    |        |        |
|----|--------------|-----------|------------|----|--------|--------|
| 68 | SAMD00514968 | DRX381035 | 1820201153 | 42 | 3971.3 | 20289  |
| 69 | SAMD00514969 | DRX381036 | 1354231916 | 30 | 4284.8 | 77356  |
| 70 | SAMD00514970 | DRX381037 | 1051530543 | 33 | 3987.5 | 16364  |
| 71 | SAMD00514971 | DRX381038 | 896989137  | 46 | 4501.1 | 17212  |
| 72 | SAMD00514972 | DRX381039 | 1609732788 | 19 | 3446.5 | 15004  |
| 73 | SAMD00514973 | DRX381040 | 1378073827 | 24 | 4168.4 | 194377 |
| 74 | SAMD00514974 | DRX381041 | 1543506009 | 51 | 3899.2 | 84467  |
| 75 | SAMD00514975 | DRX381042 | 1840922128 | 22 | 3853.9 | 16068  |
| 76 | SAMD00514976 | DRX381043 | 2042614145 | 47 | 3411.6 | 17845  |
| 77 | SAMD00514977 | DRX381044 | 1072291109 | 26 | 4142.2 | 15809  |
| 78 | SAMD00514978 | DRX381045 | 1786089159 | 49 | 3901.7 | 19893  |
| 79 | SAMD00514979 | DRX381046 | 1702386294 | 36 | 3691.3 | 17602  |
| 80 | SAMD00514980 | DRX381047 | 1514872882 | 43 | 3978.7 | 17488  |
| 81 | SAMD00514981 | DRX381048 | 1531081203 | 34 | 3996.9 | 30558  |
| 82 | SAMD00514982 | DRX381049 | 1644504644 | 26 | 3747.2 | 41424  |
| 83 | SAMD00514983 | DRX381050 | 1585904785 | 45 | 4003.1 | 16475  |
| 84 | SAMD00514984 | DRX381051 | 1465583289 | 35 | 3833.7 | 15660  |
| 85 | SAMD00514985 | DRX381052 | 1631414667 | 57 | 4055.1 | 31083  |
| 86 | SAMD00514986 | DRX381053 | 1217730069 | 44 | 3940.8 | 18461  |
| 87 | SAMD00514987 | DRX381054 | 1840812853 | 45 | 4027.8 | 15711  |
| 88 | SAMD00514988 | DRX381055 | 1105482093 | 35 | 3935.9 | 17229  |
| 89 | SAMD00514989 | DRX381056 | 1152559056 | 50 | 3776.7 | 17583  |
| 90 | SAMD00514990 | DRX381057 | 1541314457 | 41 | 3651   | 115285 |

|     |              |           |            |    |        |       |
|-----|--------------|-----------|------------|----|--------|-------|
| 91  | SAMD00514991 | DRX381058 | 1477392042 | 47 | 4460.7 | 40395 |
| 92  | SAMD00514992 | DRX381059 | 1251458910 | 50 | 3465.2 | 14134 |
| 93  | SAMD00514993 | DRX381060 | 1295112694 | 51 | 3945   | 65857 |
| 94  | SAMD00514994 | DRX381061 | 1194026247 | 58 | 3697.3 | 16593 |
| 95  | SAMD00514995 | DRX381062 | 1063396978 | 44 | 4100.1 | 16556 |
| 96  | SAMD00514996 | DRX381063 | 1319331996 | 52 | 3796.6 | 60204 |
| 97  | SAMD00514997 | DRX381064 | 1424891902 | 51 | 3531.5 | 14446 |
| 98  | SAMD00514998 | DRX381065 | 1100193455 | 27 | 3895.4 | 18247 |
| 99  | SAMD00514999 | DRX381066 | 1413163085 | 52 | 3357.6 | 16771 |
| 100 | SAMD00515000 | DRX381067 | 1322196906 | 46 | 3909.8 | 15731 |
| 101 | SAMD00515001 | DRX381068 | 1202968051 | 63 | 4168.6 | 17004 |
| 102 | SAMD00515002 | DRX381069 | 1578220472 | 32 | 4264.5 | 18113 |
| 103 | SAMD00515003 | DRX381070 | 1565160366 | 22 | 4095.2 | 15813 |
| 104 | SAMD00515004 | DRX381071 | 1799516742 | 45 | 3586.4 | 14629 |
| 105 | SAMD00515005 | DRX381072 | 927900876  | 39 | 3911.5 | 19034 |
| 106 | SAMD00515006 | DRX381073 | 1873528222 | 37 | 3614.9 | 16167 |
| 107 | SAMD00515007 | DRX381074 | 1421267857 | 16 | 4113.2 | 17618 |
| 108 | SAMD00515008 | DRX381075 | 1548612174 | 41 | 3872.9 | 15372 |
| 109 | SAMD00515009 | DRX381076 | 1362896054 | 34 | 3741.5 | 20447 |
| 110 | SAMD00515010 | DRX381077 | 1427524906 | 7  | 4064.3 | 16982 |
| 111 | SAMD00515011 | DRX381078 | 1392223394 | 58 | 3801.8 | 15663 |
| 112 | SAMD00515012 | DRX381079 | 1233353980 | 45 | 4157.4 | 16881 |
| 113 | SAMD00515013 | DRX381080 | 1479054437 | 45 | 4352.3 | 17379 |

|     |              |           |            |    |        |       |
|-----|--------------|-----------|------------|----|--------|-------|
| 114 | SAMD00515014 | DRX381081 | 1728592992 | 21 | 4113.6 | 17965 |
| 115 | SAMD00515015 | DRX381082 | 1766100198 | 49 | 4148.3 | 16118 |
| 116 | SAMD00515016 | DRX381083 | 2096124177 | 38 | 3477.6 | 14732 |

---



Table S3. Full analysis results of *MLST* verse

| Sample | Species                                                                 | Strain                         | Score       |
|--------|-------------------------------------------------------------------------|--------------------------------|-------------|
| #1     | <b><i>Mycobacterium avium</i> subsp. <i>hominissuis</i></b>             | <b>Tone-15</b>                 | <b>0.60</b> |
| #1     | <i>Mycobacterium avium</i> subsp. <i>avium</i>                          | DT 78                          | 0.33        |
| #1     | <i>Mycobacterium timonense</i>                                          | CCUG 56329                     | 0.27        |
| #2     | <b><i>Mycobacterium intracellulare</i> subsp. <i>intracellulare</i></b> | ATCC 13950                     | <b>0.41</b> |
| #2     | <i>Mycobacterium avium</i> subsp. <i>avium</i>                          | 2285 (S)                       | 0.26        |
| #2     | <i>Mycobacterium intracellulare</i> subsp. <i>chimaera</i>              | FLAC0067                       | 0.24        |
| #3     | <b><i>Mycobacterium avium</i> subsp. <i>hominissuis</i></b>             | <b>IH-145</b>                  | <b>0.47</b> |
| #3     | <i>Mycobacterium timonense</i>                                          | CCUG 56329                     | 0.26        |
| #3     | <i>Mycobacterium avium</i> subsp. <i>avium</i>                          | 11-4751                        | 0.24        |
| #4     | <b><i>Mycobacterium intracellulare</i> subsp. <i>intracellulare</i></b> | <b>MIN_061107_1834</b>         | <b>0.66</b> |
| #4     | <i>Mycobacterium avium</i> subsp. <i>avium</i>                          | 2285 (S)                       | 0.44        |
| #4     | <i>Mycobacterium intracellulare</i> subsp. <i>chimaera</i>              | FLAC0067                       | 0.25        |
| #5     | <b><i>Mycobacterium avium</i> subsp. <i>hominissuis</i></b>             | <b>OCU404</b>                  | <b>0.48</b> |
| #5     | <i>Mycobacterium avium</i> subsp. <i>avium</i>                          | DJO-44271                      | 0.28        |
| #5     | <i>Mycobacterium timonense</i>                                          | CCUG 56329                     | 0.26        |
| #6     | <b><i>Mycobacterium avium</i> subsp. <i>hominissuis</i></b>             | <b>IH-945</b>                  | <b>0.43</b> |
| #6     | <i>Mycobacterium avium</i> subsp. <i>avium</i>                          | DJO-44271                      | 0.21        |
| #6     | <i>Mycobacterium timonense</i>                                          | CCUG 56329                     | 0.21        |
| #7     | <b><i>Mycobacterium intracellulare</i> subsp. <i>intracellulare</i></b> | <b>852002-53206_SCH5915646</b> | <b>0.42</b> |
| #7     | <i>Mycobacterium avium</i> subsp. <i>avium</i>                          | 2285 (S)                       | 0.24        |
| #7     | <i>Mycobacterium intracellulare</i> subsp. <i>chimaera</i>              | FLAC0067                       | 0.19        |
| #8     | <b><i>Mycobacterium intracellulare</i> subsp. <i>chimaera</i></b>       | <b>CDC 2015-22-71</b>          | <b>0.50</b> |
| #8     | <i>Mycobacterium intracellulare</i> subsp. <i>intracellulare</i>        | MIN_052511_1280                | 0.49        |
| #8     | <i>Mycobacterium avium</i> subsp. <i>avium</i>                          | 2285 (S)                       | 0.17        |
| #9     | <b><i>Mycobacterium avium</i> subsp. <i>hominissuis</i></b>             | <b>IH-801</b>                  | <b>0.47</b> |
| #9     | <i>Mycobacterium avium</i> subsp. <i>avium</i>                          | 11-4751                        | 0.23        |
| #9     | <i>Mycobacterium avium</i> subsp. <i>paratuberculosis</i>               | FDAARGOS_305                   | 0.20        |
| #10    | <b><i>Mycobacterium intracellulare</i> subsp. <i>chimaera</i></b>       | <b>FLAC0067</b>                | <b>0.74</b> |
| #10    | <i>Mycobacterium intracellulare</i> subsp. <i>intracellulare</i>        | FLAC0181                       | 0.29        |
| #10    | <i>Mycobacterium avium</i> subsp. <i>avium</i>                          | 2285 (S)                       | 0.24        |
| #11    | <b><i>Mycobacterium avium</i> subsp. <i>hominissuis</i></b>             | <b>MK20-5</b>                  | <b>0.49</b> |
| #11    | <i>Mycobacterium timonense</i>                                          | CCUG 56329                     | 0.32        |
| #11    | <i>Mycobacterium avium</i> subsp. <i>avium</i>                          | DJO-44271                      | 0.29        |
| #12    | <b><i>Mycobacterium intracellulare</i> subsp. <i>intracellulare</i></b> | <b>M.i.198</b>                 | <b>0.62</b> |
| #12    | <i>Mycobacterium avium</i> subsp. <i>avium</i>                          | 2285 (S)                       | 0.31        |
| #12    | <i>Mycobacterium intracellulare</i> subsp. <i>chimaera</i>              | SJ42                           | 0.20        |
| #13    | <b><i>Mycobacterium avium</i> subsp. <i>hominissuis</i></b>             | <b>NN-127</b>                  | <b>0.55</b> |

|            |                                                                         |                        |             |
|------------|-------------------------------------------------------------------------|------------------------|-------------|
| #13        | <i>Mycobacterium avium</i> subsp. <i>avium</i>                          | 2285 (R)               | 0.52        |
| #13        | <i>Mycobacterium timonense</i>                                          | CCUG 56329             | 0.44        |
| <b>#14</b> | <b><i>Mycobacterium intracellulare</i> subsp. <i>intracellulare</i></b> | ATCC 13950             | <b>0.45</b> |
| #14        | <i>Mycobacterium avium</i> subsp. <i>avium</i>                          | 2285 (S)               | 0.30        |
| #14        | <i>Mycobacterium intracellulare</i> subsp. <i>chimaera</i>              | FLAC0070               | 0.27        |
| <b>#15</b> | <b><i>Mycobacterium intracellulare</i> subsp. <i>intracellulare</i></b> | FLAC0181               | 0.41        |
| #15        | <i>Mycobacterium intracellulare</i> subsp. <i>chimaera</i>              | FLAC0067               | 0.31        |
| #15        | <i>Mycobacterium avium</i> subsp. <i>avium</i>                          | 2285 (S)               | 0.29        |
| <b>#16</b> | <b><i>Mycobacterium avium</i> subsp. <i>hominissuis</i></b>             | <b>IH-945</b>          | <b>0.47</b> |
| #16        | <i>Mycobacterium intracellulare</i> subsp. <i>chimaera</i>              | FLAC0067               | 0.38        |
| #16        | <i>Mycobacterium avium</i> subsp. <i>avium</i>                          | DJO-44271              | 0.32        |
| <b>#17</b> | <b><i>Mycobacterium kansasii</i></b>                                    | <b>11-3469</b>         | <b>0.77</b> |
| <b>#18</b> | <b><i>Mycobacterium lentiflavum</i></b>                                 | <b>CSUR P1491</b>      | <b>0.82</b> |
| <b>#19</b> | <b><i>Mycobacterium abscessus</i> subsp. <i>massiliense</i></b>         | <b>471</b>             | <b>0.97</b> |
| #19        | <i>Mycobacterium abscessus</i> subsp. <i>bolletii</i>                   |                        | 0.65        |
| #19        | <i>Mycobacterium abscessus</i> subsp. <i>abscessus</i>                  | DJO-44274              | 0.65        |
| <b>#20</b> | <b><i>Mycobacterium intracellulare</i> subsp. <i>intracellulare</i></b> | <b>MIN_061107_1834</b> | <b>0.51</b> |
| #20        | <i>Mycobacterium avium</i> subsp. <i>avium</i>                          | 2285 (S)               | 0.47        |
| #20        | <i>Mycobacterium intracellulare</i> subsp. <i>chimaera</i>              | JCM_14737              | 0.18        |
| <b>#21</b> | <b><i>Mycobacterium avium</i> subsp. <i>hominissuis</i></b>             | <b>Tone-12</b>         | <b>0.56</b> |
| #21        | <i>Mycobacterium timonense</i>                                          | CCUG 56329             | 0.28        |
| #21        | <i>Mycobacterium avium</i> subsp. <i>avium</i>                          | DJO-44271              | 0.28        |
| <b>#22</b> | <b><i>Mycobacterium avium</i> subsp. <i>hominissuis</i></b>             | <b>IH-687</b>          | <b>0.54</b> |
| #22        | <i>Mycobacterium timonense</i>                                          | CCUG 56329             | 0.31        |
| #22        | <i>Mycobacterium avium</i> subsp. <i>avium</i>                          | 2285 (R)               | 0.31        |
| <b>#23</b> | <b><i>Mycobacterium avium</i> subsp. <i>hominissuis</i></b>             | <b>HF-3</b>            | <b>0.42</b> |
| #23        | <i>Mycobacterium avium</i> subsp. <i>avium</i>                          | DT 78                  | 0.27        |
| #23        | <i>Mycobacterium timonense</i>                                          | CCUG 56329             | 0.25        |
| <b>#24</b> | <b><i>Mycobacterium avium</i> subsp. <i>hominissuis</i></b>             | <b>OCU901s_S2_2s</b>   | <b>0.49</b> |
| #24        | <i>Mycobacterium avium</i> subsp. <i>avium</i>                          | DT 78                  | 0.23        |
| #24        | <i>Mycobacterium timonense</i>                                          | CCUG 56329             | 0.20        |
| <b>#25</b> | <b><i>Mycobacterium avium</i> subsp. <i>hominissuis</i></b>             | <b>IH-788</b>          | <b>0.44</b> |
| #25        | <i>Mycobacterium avium</i> subsp. <i>avium</i>                          | 11-4751                | 0.31        |
| #25        | <i>Mycobacterium timonense</i>                                          | CCUG 56329             | 0.27        |
| <b>#26</b> | <b><i>Mycobacterium avium</i> subsp. <i>hominissuis</i></b>             | <b>CAM57</b>           | <b>0.47</b> |
| #26        | <i>Mycobacterium avium</i> subsp. <i>avium</i>                          | DJO-44271              | 0.34        |
| #26        | <i>Mycobacterium timonense</i>                                          | CCUG 56329             | 0.29        |
| <b>#27</b> | <b><i>Mycobacterium avium</i> subsp. <i>hominissuis</i></b>             | <b>TR-M-4</b>          | <b>0.48</b> |
| #27        | <i>Mycobacterium avium</i> subsp. <i>avium</i>                          | DT 78                  | 0.25        |

|            |                                                                         |                                |             |
|------------|-------------------------------------------------------------------------|--------------------------------|-------------|
| #27        | <i>Mycobacterium avium</i> subsp. <i>paratuberculosis</i>               | 11-1786                        | 0.20        |
| <b>#28</b> | <b><i>Mycobacterium avium</i> subsp. <i>hominissuis</i></b>             | <b>IH-149</b>                  | <b>0.48</b> |
| #28        | <i>Mycobacterium avium</i> subsp. <i>avium</i>                          | DJO-44271                      | 0.28        |
| #28        | <i>Mycobacterium timonense</i>                                          | CCUG 56329                     | 0.27        |
| <b>#29</b> | <b><i>Mycobacterium intracellulare</i> subsp. <i>intracellulare</i></b> | <b>852002-53206_SCH5915646</b> | <b>0.33</b> |
| #29        | <i>Mycobacterium avium</i> subsp. <i>avium</i>                          | 2285 (S)                       | 0.29        |
| #29        | <i>Mycobacterium intracellulare</i> subsp. <i>chimaera</i>              | FLAC0067                       | 0.25        |
| <b>#30</b> | <b><i>Mycobacterium intracellulare</i> subsp. <i>intracellulare</i></b> | <b>FLAC0162</b>                | <b>0.39</b> |
| #30        | <i>Mycobacterium intracellulare</i> subsp. <i>chimaera</i>              | FLAC0067                       | 0.34        |
| #30        | <i>Mycobacterium avium</i> subsp. <i>avium</i>                          | 2285 (S)                       | 0.31        |
| <b>#31</b> | <b><i>Mycobacterium intracellulare</i> subsp. <i>intracellulare</i></b> | <b>MIN_061107_1834</b>         | <b>0.61</b> |
| #31        | <i>Mycobacterium avium</i> subsp. <i>avium</i>                          | 2285 (S)                       | 0.45        |
| #31        | <i>Mycobacterium intracellulare</i> subsp. <i>chimaera</i>              | FLAC0067                       | 0.21        |
| <b>#32</b> | <b><i>Mycobacterium abscessus</i> subsp. <i>abscessus</i></b>           | <b>1027</b>                    | <b>0.98</b> |
| #32        | <i>Mycobacterium abscessus</i> subsp. <i>bolletii</i>                   | 103                            | 0.77        |
| #32        | <i>Mycobacterium fortuitum</i>                                          | Z58                            | 0.70        |
| <b>#33</b> | <b><i>Mycobacterium abscessus</i> subsp. <i>massiliense</i></b>         | <b>922</b>                     | <b>0.98</b> |
| #33        | <i>Mycobacterium abscessus</i> subsp. <i>bolletii</i>                   |                                | 0.70        |
| #33        | <i>Mycobacterium abscessus</i> subsp. <i>abscessus</i>                  | 199                            | 0.40        |
| <b>#34</b> | <b><i>Mycobacterium avium</i> subsp. <i>hominissuis</i></b>             | <b>Tone-12</b>                 | <b>0.58</b> |
| #34        | <i>Mycobacterium avium</i> subsp. <i>avium</i>                          | 11-4751                        | 0.26        |
| #34        | <i>Mycobacterium avium</i> subsp. <i>silvaticum</i>                     | ATCC 49884                     | 0.21        |
| <b>#35</b> | <b><i>Mycobacterium avium</i> subsp. <i>hominissuis</i></b>             | <b>OCU466</b>                  | <b>0.47</b> |
| #35        | <i>Mycobacterium timonense</i>                                          | CCUG 56329                     | 0.32        |
| #35        | <i>Mycobacterium avium</i> subsp. <i>avium</i>                          | 11-4751                        | 0.27        |
| <b>#36</b> | <b><i>Mycobacterium avium</i> subsp. <i>hominissuis</i></b>             | <b>CAM57</b>                   | <b>0.43</b> |
| #36        | <i>Mycobacterium avium</i> subsp. <i>avium</i>                          | 11-4751                        | 0.25        |
| #36        | <i>Mycobacterium timonense</i>                                          | CCUG 56329                     | 0.20        |
| <b>#37</b> | <b><i>Mycobacterium avium</i> subsp. <i>hominissuis</i></b>             | <b>OCU901s_S2_2s</b>           | <b>0.52</b> |
| #37        | <i>Mycobacterium avium</i> subsp. <i>avium</i>                          | DJO-44271                      | 0.25        |
| #37        | <i>Mycobacterium timonense</i>                                          | CCUG 56329                     | 0.22        |
| <b>#38</b> | <b><i>Mycobacterium avium</i> subsp. <i>hominissuis</i></b>             | <b>IH-217</b>                  | <b>0.60</b> |
| #38        | <i>Mycobacterium avium</i> subsp. <i>avium</i>                          | 11-4751                        | 0.26        |
| #38        | <i>Mycobacterium avium</i> subsp. <i>silvaticum</i>                     | ATCC 49884                     | 0.23        |
| <b>#39</b> | <b><i>Mycobacterium intracellulare</i> subsp. <i>intracellulare</i></b> | <b>MIN_061107_1834</b>         | <b>0.56</b> |
| #39        | <i>Mycobacterium avium</i> subsp. <i>avium</i>                          | 2285 (S)                       | 0.45        |
| #39        | <i>Mycobacterium intracellulare</i> subsp. <i>chimaera</i>              | SJ42                           | 0.21        |
| <b>#40</b> | <b><i>Mycobacterium avium</i> subsp. <i>hominissuis</i></b>             | <b>TH135</b>                   | <b>0.40</b> |
| #40        | <i>Mycobacterium timonense</i>                                          | CCUG 56329                     | 0.20        |

|     |                                                                         |                        |             |
|-----|-------------------------------------------------------------------------|------------------------|-------------|
| #40 | <i>Mycobacterium avium</i> subsp. <i>avium</i>                          | 11-4751                | 0.20        |
| #41 | <b><i>Mycobacterium avium</i> subsp. <i>hominissuis</i></b>             | <b>TR-M-4</b>          | <b>0.66</b> |
| #41 | <i>Mycobacterium avium</i> subsp. <i>avium</i>                          | 11-4751                | 0.23        |
| #41 | <i>Mycobacterium timonense</i>                                          | CCUG 56329             | 0.21        |
| #42 | <b><i>Mycobacterium avium</i> subsp. <i>hominissuis</i></b>             | <b>IH-550</b>          | <b>0.63</b> |
| #42 | <i>Mycobacterium avium</i> subsp. <i>avium</i>                          | 11-4751                | 0.40        |
| #42 | <i>Mycobacterium timonense</i>                                          | CCUG 56329             | 0.40        |
| #43 | <b><i>Mycobacterium paragordoniae</i></b>                               |                        | <b>0.63</b> |
| #43 | <i>Mycobacterium gordonae</i>                                           | 1275229.4              | 0.54        |
| #44 | <b><i>Mycobacterium abscessus</i> subsp. <i>massiliense</i></b>         | <b>1140</b>            | <b>0.84</b> |
| #44 | <i>Mycobacterium abscessus</i> subsp. <i>bolletii</i>                   | M18                    | 0.68        |
| #44 | <i>Mycobacterium abscessus</i> subsp. <i>abscessus</i>                  | DJO-44274              | 0.67        |
| #45 | <b><i>Mycobacterium avium</i> subsp. <i>hominissuis</i></b>             | <b>IH-145</b>          | <b>0.48</b> |
| #45 | <i>Mycobacterium avium</i> subsp. <i>avium</i>                          | 11-4751                | 0.21        |
| #45 | <i>Mycobacterium avium</i> subsp. <i>paratuberculosis</i>               | 10-5975                | 0.21        |
| #46 | <b><i>Mycobacterium avium</i> subsp. <i>hominissuis</i></b>             | <b>NN-108</b>          | <b>0.58</b> |
| #46 | <i>Mycobacterium avium</i> subsp. <i>avium</i>                          | DJO-44271              | 0.30        |
| #46 | <i>Mycobacterium timonense</i>                                          | CCUG 56329             | 0.28        |
| #47 | <b><i>Mycobacterium avium</i> subsp. <i>hominissuis</i></b>             | <b>OCU901s_S2_2s</b>   | <b>0.48</b> |
| #47 | <i>Mycobacterium avium</i> subsp. <i>avium</i>                          | 11-4751                | 0.27        |
| #47 | <i>Mycobacterium avium</i> subsp. <i>silvaticum</i>                     | ATCC 49884             | 0.24        |
| #48 | <b><i>Mycobacterium avium</i> subsp. <i>hominissuis</i></b>             | <b>Tone-15</b>         | <b>0.41</b> |
| #48 | <i>Mycobacterium avium</i> subsp. <i>avium</i>                          | 11-4751                | 0.27        |
| #48 | <i>Mycobacterium timonense</i>                                          | CCUG 56329             | 0.22        |
| #49 | <b><i>Mycobacterium avium</i> subsp. <i>hominissuis</i></b>             | <b>Tone-13</b>         | <b>0.60</b> |
| #49 | <i>Mycobacterium avium</i> subsp. <i>avium</i>                          | 11-4751                | 0.23        |
| #49 | <i>Mycobacterium timonense</i>                                          | CCUG 56329             | 0.22        |
| #50 | <b><i>Mycobacterium intracellulare</i> subsp. <i>intracellulare</i></b> | <b>MIN_061107_1834</b> | <b>0.50</b> |
| #50 | <i>Mycobacterium avium</i> subsp. <i>avium</i>                          | 2285 (S)               | 0.38        |
| #50 | <i>Mycobacterium intracellulare</i> subsp. <i>chimaera</i>              | FLAC0067               | 0.23        |
| #51 | <b><i>Mycobacterium intracellulare</i> subsp. <i>intracellulare</i></b> | <b>ATCC 13950</b>      | <b>0.45</b> |
| #51 | <i>Mycobacterium avium</i> subsp. <i>avium</i>                          | 2285 (S)               | 0.38        |
| #51 | <i>Mycobacterium intracellulare</i> subsp. <i>chimaera</i>              | JCM_14737              | 0.21        |
| #52 | <b><i>Mycobacterium avium</i> subsp. <i>hominissuis</i></b>             | <b>Tone-12</b>         | <b>0.54</b> |
| #52 | <i>Mycobacterium avium</i> subsp. <i>avium</i>                          | DJO-44271              | 0.28        |
| #52 | <i>Mycobacterium timonense</i>                                          | CCUG 56329             | 0.27        |
| #53 | <b><i>Mycobacterium gordonae</i></b>                                    | <b>CTRI 14-8773</b>    | <b>0.81</b> |
| #54 | <b><i>Mycobacterium avium</i> subsp. <i>hominissuis</i></b>             | <b>TR-M-4</b>          | <b>0.68</b> |
| #54 | <i>Mycobacterium avium</i> subsp. <i>avium</i>                          | 2285 (R)               | 0.44        |

|     |                                                                         |                      |             |
|-----|-------------------------------------------------------------------------|----------------------|-------------|
| #54 | <i>Mycobacterium avium</i> subsp. <i>paratuberculosis</i>               | 10-4404              | 0.43        |
| #55 | <b><i>Mycobacterium avium</i> subsp. <i>hominissuis</i></b>             | <b>IH-687</b>        | <b>0.63</b> |
| #55 | <i>Mycobacterium timonense</i>                                          | CCUG 56329           | 0.48        |
| #55 | <i>Mycobacterium avium</i> subsp. <i>avium</i>                          | DJO-44271            | 0.46        |
| #56 | <b><i>Mycobacterium avium</i> subsp. <i>hominissuis</i></b>             | <b>OCU901s_S2_2s</b> | <b>0.68</b> |
| #56 | <i>Mycobacterium avium</i> subsp. <i>avium</i>                          | 11-4751              | 0.35        |
| #56 | <i>Mycobacterium timonense</i>                                          | CCUG 56329           | 0.34        |
| #57 | <b><i>Mycobacterium avium</i> subsp. <i>hominissuis</i></b>             | <b>OCU462</b>        | <b>0.55</b> |
| #57 | <i>Mycobacterium timonense</i>                                          | CCUG 56329           | 0.45        |
| #57 | <i>Mycobacterium avium</i> subsp. <i>avium</i>                          | 2285 (R)             | 0.42        |
| #58 | <b><i>Mycobacterium avium</i> subsp. <i>hominissuis</i></b>             | <b>IH-217</b>        | <b>0.66</b> |
| #58 | <i>Mycobacterium avium</i> subsp. <i>avium</i>                          | 2285 (R)             | 0.47        |
| #58 | <i>Mycobacterium timonense</i>                                          | CCUG 56329           | 0.45        |
| #59 | <b><i>Mycobacterium intracellulare</i> subsp. <i>intracellulare</i></b> | <b>ATCC 13950</b>    | <b>0.72</b> |
| #59 | <i>Mycobacterium avium</i> subsp. <i>avium</i>                          | 2285 (S)             | 0.62        |
| #59 | <i>Mycobacterium intracellulare</i> subsp. <i>chimaera</i>              | FLAC0067             | 0.55        |
| #60 | <b><i>Mycobacterium avium</i> subsp. <i>hominissuis</i></b>             | <b>OCU404</b>        | <b>0.58</b> |
| #60 | <i>Mycobacterium timonense</i>                                          | CCUG 56329           | 0.47        |
| #60 | <i>Mycobacterium avium</i> subsp. <i>avium</i>                          | 11-4751              | 0.44        |
| #61 | <b><i>Mycobacterium avium</i> subsp. <i>hominissuis</i></b>             | <b>IH-065</b>        | <b>0.63</b> |
| #61 | <i>Mycobacterium timonense</i>                                          | CCUG 56329           | 0.51        |
| #61 | <i>Mycobacterium avium</i> subsp. <i>avium</i>                          | DJO-44271            | 0.47        |
| #62 | <b><i>Mycobacterium lentiflavum</i></b>                                 | <b>CSUR P1491</b>    | <b>0.92</b> |
| #62 | <i>Mycobacterium triplex</i>                                            | DSM 44626            | 0.15        |
| #62 | <i>Mycobacterium stomatepiae</i>                                        |                      | 0.15        |
| #63 | <b><i>Mycobacterium avium</i> subsp. <i>hominissuis</i></b>             | <b>Tone-1</b>        | <b>0.57</b> |
| #63 | <i>Mycobacterium avium</i> subsp. <i>avium</i>                          | ATCC 25291           | 0.40        |
| #63 | <i>Mycobacterium timonense</i>                                          | CCUG 56329           | 0.39        |
| #64 | <b><i>Mycobacterium avium</i> subsp. <i>hominissuis</i></b>             | <b>OCU466</b>        | <b>0.61</b> |
| #64 | <i>Mycobacterium timonense</i>                                          | CCUG 56329           | 0.52        |
| #64 | <i>Mycobacterium avium</i> subsp. <i>avium</i>                          | 11-4751              | 0.50        |
| #65 | <b><i>Mycobacterium avium</i> subsp. <i>hominissuis</i></b>             | <b>DH-6</b>          | <b>0.73</b> |
| #65 | <i>Mycobacterium avium</i> subsp. <i>avium</i>                          | DJO-44271            | 0.50        |
| #65 | <i>Mycobacterium timonense</i>                                          | CCUG 56329           | 0.49        |
| #66 | <b><i>Mycobacterium avium</i> subsp. <i>hominissuis</i></b>             | <b>OCU901s_S2_2s</b> | <b>0.69</b> |
| #66 | <i>Mycobacterium avium</i> subsp. <i>avium</i>                          | 11-4751              | 0.37        |
| #66 | <i>Mycobacterium timonense</i>                                          | CCUG 56329           | 0.36        |
| #67 | <b><i>Mycobacterium avium</i> subsp. <i>hominissuis</i></b>             | <b>OCU901s_S2_2s</b> | <b>0.62</b> |
| #67 | <i>Mycobacterium timonense</i>                                          | CCUG 56329           | 0.47        |

|            |                                                                         |                         |             |
|------------|-------------------------------------------------------------------------|-------------------------|-------------|
| #67        | <i>Mycobacterium avium</i> subsp. <i>avium</i>                          | 2285 (R)                | 0.46        |
| <b>#68</b> | <b><i>Mycobacterium avium</i> subsp. <i>hominissuis</i></b>             | <b>DH-5</b>             | <b>0.60</b> |
| #68        | <i>Mycobacterium avium</i> subsp. <i>avium</i>                          | DJO-44271               | 0.42        |
| #68        | <i>Mycobacterium timonense</i>                                          | CCUG 56329              | 0.42        |
| <b>#69</b> | <b><i>Mycobacterium porcinum</i></b>                                    | <b>IP141460001</b>      | <b>0.94</b> |
| #69        | <i>Mycobacterium boenickei</i>                                          |                         | 0.47        |
| #69        | <i>Mycobacterium neworleansense</i>                                     | type strain: ATCC 49404 | 0.22        |
| <b>#70</b> | <b><i>Mycobacterium avium</i> subsp. <i>hominissuis</i></b>             | <b>IH-065</b>           | <b>0.54</b> |
| #70        | <i>Mycobacterium timonense</i>                                          | CCUG 56329              | 0.46        |
| #70        | <i>Mycobacterium avium</i> subsp. <i>avium</i>                          | 2285 (R)                | 0.43        |
| <b>#71</b> | <b><i>Mycobacterium szulgai</i></b>                                     | <b>DSM 44166</b>        | <b>0.88</b> |
| #71        | <i>Mycobacterium angelicum</i>                                          | DSM 45057               | 0.38        |
| <b>#72</b> | <b><i>Mycobacterium abscessus</i> subsp. <i>abscessus</i></b>           | <b>522</b>              | <b>0.98</b> |
| #72        | <i>Mycobacterium fortuitum</i>                                          | Z58                     | 0.87        |
| #72        | <i>Mycobacterium abscessus</i> subsp. <i>bolletii</i>                   | 103                     | 0.80        |
| <b>#73</b> | <b><i>Mycobacterium fortuitum</i></b>                                   | <b>E1336</b>            | <b>0.91</b> |
| <b>#73</b> | <b><i>Mycobacterium fortuitum</i> subsp. <i>fortuitum</i></b>           | <b>ATCC 6841</b>        | <b>0.86</b> |
| #73        | <i>Mycobacterium fortuitum</i> subsp. <i>acetamidolyticum</i>           | JCM6368                 | 0.80        |
| <b>#74</b> | <b><i>Mycobacterium peregrinum</i></b>                                  | <b>DSM 43271</b>        | <b>0.94</b> |
| #74        | <i>Mycobacterium septicum</i>                                           | type strain: DSM 44393  | 0.23        |
| #74        | <i>Mycobacterium neworleansense</i>                                     | type strain: ATCC 49404 | 0.20        |
| <b>#75</b> | <b><i>Mycobacterium avium</i> subsp. <i>hominissuis</i></b>             | <b>OCU404</b>           | <b>0.67</b> |
| #75        | <i>Mycobacterium avium</i> subsp. <i>avium</i>                          | DJO-44271               | 0.47        |
| #75        | <i>Mycobacterium timonense</i>                                          | CCUG 56329              | 0.44        |
| <b>#76</b> | <b><i>Mycobacterium intracellulare</i> subsp. <i>intracellulare</i></b> | <b>MOTT-02</b>          | <b>0.79</b> |
| #76        | <i>Mycobacterium avium</i> subsp. <i>avium</i>                          | 2285 (S)                | 0.65        |
| #76        | <i>Mycobacterium intracellulare</i> subsp. <i>chimaera</i>              | FLAC0067                | 0.55        |
| <b>#77</b> | <b><i>Mycobacterium avium</i> subsp. <i>hominissuis</i></b>             | <b>OCU901s_S2_2s</b>    | <b>0.63</b> |
| #77        | <i>Mycobacterium timonense</i>                                          | CCUG 56329              | 0.45        |
| #77        | <i>Mycobacterium avium</i> subsp. <i>avium</i>                          | 2285 (R)                | 0.44        |
| <b>#78</b> | <b><i>Mycobacterium intracellulare</i> subsp. <i>intracellulare</i></b> | <b>MIN_061107_1834</b>  | <b>0.64</b> |
| #78        | <i>Mycobacterium avium</i> subsp. <i>avium</i>                          | 2285 (S)                | 0.59        |
| #78        | <i>Mycobacterium intracellulare</i> subsp. <i>chimaera</i>              | FLAC0067                | 0.45        |
| <b>#79</b> | <b><i>Mycobacterium avium</i> subsp. <i>hominissuis</i></b>             | <b>TR-M-4</b>           | <b>0.65</b> |
| #79        | <i>Mycobacterium avium</i> subsp. <i>avium</i>                          | 2285 (R)                | 0.37        |
| #79        | <i>Mycobacterium timonense</i>                                          | CCUG 56329              | 0.36        |
| <b>#80</b> | <b><i>Mycobacterium intracellulare</i> subsp. <i>intracellulare</i></b> | <b>ATCC 13950</b>       | <b>0.65</b> |
| #80        | <i>Mycobacterium avium</i> subsp. <i>avium</i>                          | 2285 (S)                | 0.60        |
| #80        | <i>Mycobacterium intracellulare</i> subsp. <i>chimaera</i>              | FLAC0067                | 0.51        |

|     |                                                                         |                        |             |
|-----|-------------------------------------------------------------------------|------------------------|-------------|
| #81 | <b><i>Mycobacterium avium</i> subsp. <i>hominissuis</i></b>             | <b>IH-145</b>          | <b>0.66</b> |
| #81 | <i>Mycobacterium avium</i> subsp. <i>paratuberculosis</i>               | 10-4404                | 0.39        |
| #81 | <i>Mycobacterium timonense</i>                                          | CCUG 56329             | 0.39        |
| #82 | <b><i>Mycobacterium avium</i> subsp. <i>hominissuis</i></b>             | <b>TR-M-3</b>          | <b>0.71</b> |
| #82 | <i>Mycobacterium avium</i> subsp. <i>avium</i>                          | DJO-44271              | 0.41        |
| #82 | <i>Mycobacterium timonense</i>                                          | CCUG 56329             | 0.40        |
| #83 | <b><i>Mycobacterium avium</i> subsp. <i>hominissuis</i></b>             | <b>CAM57</b>           | <b>0.67</b> |
| #83 | <i>Mycobacterium avium</i> subsp. <i>avium</i>                          | DJO-44271              | 0.47        |
| #83 | <i>Mycobacterium timonense</i>                                          | CCUG 56329             | 0.44        |
| #84 | <b><i>Mycobacterium intracellulare</i> subsp. <i>intracellulare</i></b> | <b>MIN_061107_1834</b> | <b>0.77</b> |
| #84 | <i>Mycobacterium avium</i> subsp. <i>avium</i>                          | 2285 (S)               | 0.66        |
| #84 | <i>Mycobacterium intracellulare</i> subsp. <i>chimaera</i>              | FLAC0067               | 0.53        |
| #85 | <b><i>Mycobacterium paragordoniae</i></b>                               |                        | <b>0.75</b> |
| #85 | <i>Mycobacterium gordonae</i>                                           | 1275229.4              | 0.68        |
| #86 | <b><i>Mycobacterium avium</i> subsp. <i>hominissuis</i></b>             | <b>IH-217</b>          | <b>0.68</b> |
| #86 | <i>Mycobacterium avium</i> subsp. <i>avium</i>                          | 2285 (R)               | 0.45        |
| #86 | <i>Mycobacterium timonense</i>                                          | CCUG 56329             | 0.43        |
| #87 | <b><i>Mycobacterium intracellulare</i> subsp. <i>intracellulare</i></b> | <b>M.i.198</b>         | <b>0.67</b> |
| #87 | <i>Mycobacterium avium</i> subsp. <i>avium</i>                          | 2285 (S)               | 0.54        |
| #87 | <i>Mycobacterium intracellulare</i> subsp. <i>chimaera</i>              | FLAC0067               | 0.43        |
| #88 | <b><i>Mycobacterium avium</i> subsp. <i>hominissuis</i></b>             | <b>DH-8-4</b>          | <b>0.52</b> |
| #88 | <i>Mycobacterium avium</i> subsp. <i>avium</i>                          | 2285 (S)               | 0.43        |
| #88 | <i>Mycobacterium timonense</i>                                          | CCUG 56329             | 0.40        |
| #89 | <b><i>Mycobacterium intracellulare</i> subsp. <i>intracellulare</i></b> | <b>ATCC 13950</b>      | <b>0.74</b> |
| #89 | <i>Mycobacterium avium</i> subsp. <i>avium</i>                          | 2285 (S)               | 0.64        |
| #89 | <i>Mycobacterium intracellulare</i> subsp. <i>chimaera</i>              | FLAC0067               | 0.51        |
| #90 | <b><i>Mycobacterium abscessus</i> subsp. <i>massiliense</i></b>         | <b>932</b>             | <b>1.00</b> |
| #90 | <i>Mycobacterium abscessus</i> subsp. <i>bolletii</i>                   | MM1513                 | 0.88        |
| #90 | <i>Mycobacterium abscessus</i> subsp. <i>abscessus</i>                  | 199                    | 0.60        |
| #91 | <b><i>Mycobacterium intracellulare</i> subsp. <i>intracellulare</i></b> | <b>FLAC0133</b>        | <b>0.64</b> |
| #91 | <i>Mycobacterium avium</i> subsp. <i>avium</i>                          | 2285 (S)               | 0.57        |
| #91 | <i>Mycobacterium intracellulare</i> subsp. <i>chimaera</i>              | FLAC0067               | 0.47        |
| #92 | <b><i>Mycobacterium avium</i> subsp. <i>hominissuis</i></b>             | <b>CAM177</b>          | <b>0.67</b> |
| #92 | <i>Mycobacterium timonense</i>                                          | CCUG 56329             | 0.43        |
| #92 | <i>Mycobacterium avium</i> subsp. <i>avium</i>                          | 11-4751                | 0.42        |
| #93 | <b><i>Mycobacterium paragordoniae</i></b>                               |                        | <b>0.73</b> |
| #93 | <i>Mycobacterium gordonae</i>                                           | 1275229.4              | 0.69        |
| #94 | <b><i>Mycobacterium avium</i> subsp. <i>hominissuis</i></b>             | <b>TR-M-4</b>          | <b>0.73</b> |
| #94 | <i>Mycobacterium avium</i> subsp. <i>avium</i>                          | 11-4751                | 0.40        |

|             |                                                                         |                  |             |
|-------------|-------------------------------------------------------------------------|------------------|-------------|
| #94         | <i>Mycobacterium timonense</i>                                          | CCUG 56329       | 0.39        |
| <b>#95</b>  | <b><i>Mycobacterium intracellulare</i> subsp. <i>intracellulare</i></b> | <b>FLAC0181</b>  | <b>0.69</b> |
| #95         | <i>Mycobacterium avium</i> subsp. <i>avium</i>                          | 2285 (S)         | 0.59        |
| #95         | <i>Mycobacterium intracellulare</i> subsp. <i>chimaera</i>              | FLAC0067         | 0.54        |
| <b>#96</b>  | <b><i>Mycobacterium intracellulare</i> subsp. <i>intracellulare</i></b> | <b>FLAC0162</b>  | <b>0.65</b> |
| #96         | <i>Mycobacterium avium</i> subsp. <i>avium</i>                          | 2285 (S)         | 0.61        |
| #96         | <i>Mycobacterium intracellulare</i> subsp. <i>chimaera</i>              | FLAC0067         | 0.45        |
| <b>#97</b>  | <b><i>Mycobacterium avium</i> subsp. <i>hominissuis</i></b>             | <b>OCU466</b>    | <b>0.56</b> |
| #97         | <i>Mycobacterium timonense</i>                                          | CCUG 56329       | 0.45        |
| #97         | <i>Mycobacterium avium</i> subsp. <i>avium</i>                          | 2285 (R)         | 0.43        |
| <b>#98</b>  | <b><i>Mycobacterium avium</i> subsp. <i>hominissuis</i></b>             | <b>TR-M-4</b>    | <b>0.58</b> |
| #98         | <i>Mycobacterium avium</i> subsp. <i>avium</i>                          | 11-4751          | 0.36        |
| #98         | <i>Mycobacterium timonense</i>                                          | CCUG 56329       | 0.32        |
| <b>#99</b>  | <b><i>Mycobacterium chelonae</i></b>                                    | <b>24998</b>     | <b>1.00</b> |
| #99         | <i>Mycobacterium stephanolepidis</i>                                    | NJB0901          | 0.28        |
| <b>#100</b> | <b><i>Mycobacterium avium</i> subsp. <i>hominissuis</i></b>             | <b>IH-550</b>    | <b>0.68</b> |
| #100        | <i>Mycobacterium avium</i> subsp. <i>avium</i>                          | DJO-44271        | 0.51        |
| #100        | <i>Mycobacterium timonense</i>                                          | CCUG 56329       | 0.48        |
| <b>#101</b> | <b><i>Mycobacterium avium</i> subsp. <i>hominissuis</i></b>             | <b>TR-M-4</b>    | <b>0.72</b> |
| #101        | <i>Mycobacterium avium</i> subsp. <i>avium</i>                          | 2285 (R)         | 0.38        |
| #101        | <i>Mycobacterium timonense</i>                                          | CCUG 56329       | 0.38        |
| <b>#102</b> | <b><i>Mycobacterium abscessus</i> subsp. <i>abscessus</i></b>           | <b>1106</b>      | <b>1.00</b> |
| #102        | <i>Mycobacterium fortuitum</i>                                          | Z58              | 0.90        |
| #102        | <i>Mycobacterium abscessus</i> subsp. <i>bolletii</i>                   | 103              | 0.83        |
| <b>#103</b> | <b><i>Mycobacterium abscessus</i> subsp. <i>massiliense</i></b>         | <b>1141</b>      | <b>1.00</b> |
| #103        | <i>Mycobacterium abscessus</i> subsp. <i>bolletii</i>                   |                  | 0.82        |
| #103        | <i>Mycobacterium abscessus</i> subsp. <i>abscessus</i>                  | 199              | 0.57        |
| <b>#104</b> | <b><i>Mycobacterium avium</i> subsp. <i>hominissuis</i></b>             | <b>Tone-16</b>   | <b>0.57</b> |
| #104        | <i>Mycobacterium avium</i> subsp. <i>avium</i>                          | DT 78            | 0.46        |
| #104        | <i>Mycobacterium avium</i> subsp. <i>paratuberculosis</i>               | 10-4404          | 0.44        |
| <b>#105</b> | <b><i>Mycobacterium avium</i> subsp. <i>hominissuis</i></b>             | <b>11</b>        | <b>0.59</b> |
| #105        | <i>Mycobacterium avium</i> subsp. <i>avium</i>                          | DT 78            | 0.47        |
| #105        | <i>Mycobacterium timonense</i>                                          | CCUG 56329       | 0.37        |
| <b>#106</b> | <b><i>Mycobacterium peregrinum</i></b>                                  | <b>DSM 43271</b> | <b>0.90</b> |
| #106        | <i>Mycobacterium porcinum</i>                                           | IP141460001      | 0.19        |
| #106        | <i>Mycobacterium vulneris</i>                                           | DSM 45247        | 0.19        |
| <b>#107</b> | <b><i>Mycobacterium intracellulare</i> subsp. <i>intracellulare</i></b> | <b>FLAC0162</b>  | <b>0.73</b> |
| #107        | <i>Mycobacterium avium</i> subsp. <i>avium</i>                          | 2285 (S)         | 0.61        |
| #107        | <i>Mycobacterium intracellulare</i> subsp. <i>chimaera</i>              | FLAC0067         | 0.50        |



|             |                                                                         |                      |             |
|-------------|-------------------------------------------------------------------------|----------------------|-------------|
| <b>#108</b> | <b><i>Mycobacterium avium</i> subsp. <i>hominissuis</i></b>             | <b>TR-M-1</b>        | <b>0.64</b> |
| #108        | <i>Mycobacterium avium</i> subsp. <i>avium</i>                          | DJO-44271            | 0.46        |
| #108        | <i>Mycobacterium timonense</i>                                          | CCUG 56329           | 0.45        |
| <b>#109</b> | <b><i>Mycobacterium avium</i> subsp. <i>hominissuis</i></b>             | <b>TR-M-1</b>        | <b>0.69</b> |
| #109        | <i>Mycobacterium timonense</i>                                          | CCUG 56329           | 0.54        |
| #109        | <i>Mycobacterium avium</i> subsp. <i>avium</i>                          | DT 78                | 0.49        |
| <b>#110</b> | <b><i>Mycobacterium intracellulare</i> subsp. <i>intracellulare</i></b> | <b>FLAC0181</b>      | <b>0.74</b> |
| #110        | <i>Mycobacterium avium</i> subsp. <i>avium</i>                          | 2285 (S)             | 0.67        |
| #110        | <i>Mycobacterium intracellulare</i> subsp. <i>chimaera</i>              | FLAC0067             | 0.61        |
| <b>#111</b> | <b><i>Mycobacterium avium</i> subsp. <i>hominissuis</i></b>             | <b>OCU404</b>        | <b>0.58</b> |
| #111        | <i>Mycobacterium avium</i> subsp. <i>avium</i>                          | 2285 (R)             | 0.41        |
| #111        | <i>Mycobacterium timonense</i>                                          | CCUG 56329           | 0.40        |
| <b>#112</b> | <b><i>Mycobacterium avium</i> subsp. <i>hominissuis</i></b>             | <b>IH-217</b>        | <b>0.62</b> |
| #112        | <i>Mycobacterium timonense</i>                                          | CCUG 56329           | 0.41        |
| #112        | <i>Mycobacterium avium</i> subsp. <i>avium</i>                          | DJO-44271            | 0.39        |
| <b>#113</b> | <b><i>Mycobacterium avium</i> subsp. <i>hominissuis</i></b>             | <b>TR-M-4</b>        | <b>0.69</b> |
| #113        | <i>Mycobacterium avium</i> subsp. <i>avium</i>                          | DJO-44271            | 0.39        |
| #113        | <i>Mycobacterium timonense</i>                                          | CCUG 56329           | 0.38        |
| <b>#114</b> | <b><i>Mycobacterium avium</i> subsp. <i>hominissuis</i></b>             | <b>OCU901s_S2_2s</b> | <b>0.56</b> |
| #114        | <i>Mycobacterium avium</i> subsp. <i>avium</i>                          | DJO-44271            | 0.39        |
| #114        | <i>Mycobacterium timonense</i>                                          | CCUG 56329           | 0.38        |
| <b>#115</b> | <b><i>Mycobacterium avium</i> subsp. <i>hominissuis</i></b>             | <b>DH-7</b>          | <b>0.65</b> |
| #115        | <i>Mycobacterium avium</i> subsp. <i>avium</i>                          | DJO-44271            | 0.50        |
| #115        | <i>Mycobacterium timonense</i>                                          | CCUG 56329           | 0.49        |
| <b>#116</b> | <b><i>Mycobacterium avium</i> subsp. <i>hominissuis</i></b>             | <b>DH-7</b>          | <b>0.69</b> |
| #116        | <i>Mycobacterium avium</i> subsp. <i>avium</i>                          | DJO-44271            | 0.56        |
| #116        | <i>Mycobacterium timonense</i>                                          | CCUG 56329           | 0.53        |

MLST, multi-locus sequence typing; sp, species; subsp, subspecies.

Table S4. Whole genome comparison using ANI calculation

| No.   | Species name                                   | Strain          | RefSeq/GenBank accession | Type strain? | RefSeq category       | ANI (%) |
|-------|------------------------------------------------|-----------------|--------------------------|--------------|-----------------------|---------|
| No.53 | <i>Mycobacterium paragordoniae</i>             | JCM 18565       | GCF_010723415.1          | Yes          | na                    | 88.1    |
|       | <i>Mycobacterium gordonae</i>                  | DSM 44160       | GCF_002101675.1          | Yes          | representative genome | 86.5    |
|       | <i>Mycobacterium</i> sp. 20KCMC460             | 20KCMC460       | GCF_022179425.1          | No           | na                    | 81.2    |
|       | <i>Mycobacterium</i> sp. IWGMT90018-18076      | IWGMT90018      | GCF_021654635.1          | No           | na                    | 80.8    |
|       | <i>Mycobacterium asiaticum</i>                 | DSM 44297       | GCF_000613245.1          | Yes          | representative genome | 80.5    |
|       | <i>Mycobacterium vicinigordoniae</i>           | 24              | GCF_013466425.1          | Yes          | representative genome | 79.8    |
|       | <i>Mycobacterium</i> sp. MAC_011194_8550       | MAC_011194_8550 | GCF_000523635.1          | No           | na                    | 79.7    |
|       | <i>Mycobacterium avium</i>                     | CECT 7407       | GCF_015708165.1          | No           | na                    | 79.7    |
|       | <i>Mycobacterium paraense</i>                  | IEC26           | GCF_002101815.1          | Yes          | representative genome | 79.7    |
|       | <i>Mycobacterium avium</i> subsp. <i>avium</i> | FDAARGOS_1608   | GCF_021183845.1          | No           | na                    | 79.7    |
| No.71 | <i>Mycobacterium szulgai</i>                   | DSM 44166       | GCF_002116635.1          | Yes          | representative genome | 99.4    |
|       | <i>Mycobacterium angelicum</i>                 | DSM 45057       | GCF_002086155.1          | Yes          | representative genome | 93.1    |
|       | <i>Mycobacterium simulans</i>                  | FI-09026        | GCF_900232995.1          | Yes          | representative genome | 82.1    |
|       | <i>Mycobacterium riyadhense</i>                | DSM 45176       | GCF_002101845.1          | Yes          | na                    | 82.0    |
|       | <i>Mycobacterium lacus</i>                     | JCM 15657       | GCF_010731535.1          | Yes          | representative genome | 81.3    |

|       |                                                      |               |                 |     |                       |      |
|-------|------------------------------------------------------|---------------|-----------------|-----|-----------------------|------|
|       | <i>Mycobacterium shinjukuense</i>                    | JCM 14233     | GCF_010730055.1 | Yes | representative genome | 81.1 |
|       | <i>Mycobacterium heidelbergense</i>                  | JCM 14842     | GCF_010730745.1 | Yes | representative genome | 81.0 |
|       | <i>Mycobacterium malmoense</i>                       | ATCC 29571    | GCF_019645855.1 | Yes | representative genome | 80.9 |
|       | <i>Mycobacterium ostraviense</i>                     | FDAARGOS_1613 | GCF_021183725.1 | No  | representative genome | 80.8 |
|       | <i>Mycobacterium</i> sp. E3198                       | E3198         | GCF_001667015.1 | No  | na                    | 80.7 |
| No.85 | <i>Mycobacterium paragordoniae</i>                   | JCM 18565     | GCF_010723415.1 | Yes | na                    | 87.7 |
|       | <i>Mycobacterium gordonae</i>                        | DSM 44160     | GCF_002101675.1 | Yes | representative genome | 86.0 |
|       | <i>Mycobacterium</i> sp. IWGMT90018-18076            | IWGMT90018    | GCF_021654635.1 | No  | na                    | 81.8 |
|       | <i>Mycobacterium</i> sp. 20KCMC460                   | 20KCMC460     | GCF_022179425.1 | No  | na                    | 81.6 |
|       | <i>Mycobacterium asiaticum</i>                       | DSM 44297     | GCF_000613245.1 | Yes | representative genome | 81.3 |
|       | <i>Mycobacterium vicinigordoniae</i>                 | 24            | GCF_013466425.1 | Yes | representative genome | 80.6 |
|       | <i>Mycobacterium paraense</i>                        | IEC26         | GCF_002101815.1 | Yes | representative genome | 80.6 |
|       | <i>Mycobacterium avium</i> subsp. <i>hominissuis</i> | A5            | GCF_000696715.1 | No  | representative genome | 80.6 |
|       | <i>Mycobacterium timonense</i>                       | CCUG 56329    | GCF_002086775.1 | Yes | representative genome | 80.5 |
|       | <i>Mycobacterium avium</i>                           | CECT 7407     | GCF_015708165.1 | No  | na                    | 80.4 |
| No.93 | <i>Mycobacterium paragordoniae</i>                   | JCM 18565     | GCF_010723415.1 | Yes | na                    | 87.5 |

|                                                           |                 |                 |     |                       |      |
|-----------------------------------------------------------|-----------------|-----------------|-----|-----------------------|------|
| <i>Mycobacterium gordonae</i>                             | DSM 44160       | GCF_002101675.1 | Yes | representative genome | 86.1 |
| <i>Mycobacterium</i> sp. IWGMT90018-18076                 | IWGMT90018      | GCF_021654635.1 | No  | na                    | 81.6 |
| <i>Mycobacterium</i> sp. 20KCMC460                        | 20KCMC460       | GCF_022179425.1 | No  | na                    | 81.5 |
| <i>Mycobacterium asiaticum</i>                            | DSM 44297       | GCF_000613245.1 | Yes | representative genome | 81.2 |
| <i>Mycobacterium vicinigordonae</i>                       | 24              | GCF_013466425.1 | Yes | representative genome | 80.4 |
| <i>Mycobacterium avium</i> subsp. <i>paratuberculosis</i> | MAP-Gt-9        | GCF_021696875.1 | No  | na                    | 80.4 |
| <i>Mycobacterium avium</i> subsp. <i>hominissuis</i>      | A5              | GCF_000696715.1 | No  | representative genome | 80.4 |
| <i>Mycobacterium</i> sp. MAC_011194_8550                  | MAC_011194_8550 | GCF_000523635.1 | No  | na                    | 80.3 |
| <i>Mycobacterium timonense</i>                            | CCUG 56329      | GCF_002086775.1 | Yes | representative genome | 80.3 |

---

ANI, average nucleotide identity; sp, species; subsp, subspecies.

Table S5. Efficacy of identification results and macrolide resistance prediction by MGIT-seq in comparison of current standard identification methods and drug susceptibility tests.

| No. | Standard clinical protocol                                         |                                     |        | Identification and macrolide resistance prediction by <i>MLST</i> verse and MinION |                                  |   |                               |   |                                    |
|-----|--------------------------------------------------------------------|-------------------------------------|--------|------------------------------------------------------------------------------------|----------------------------------|---|-------------------------------|---|------------------------------------|
|     | TRC, MALDI-TOF MS, and Multiplex PCR and chromatographic detection | Drug susceptibility test<br>CAM MIC |        | <i>MLST</i> verse                                                                  | <i>rrl</i> position<br>2058 2059 |   | Erm (41) position<br>state 28 |   | Predicted Macrolide susceptibility |
| 32  | <i>M. abscessus/bolletii</i>                                       | R                                   | >32    | <i>M. abscessus</i> subsp. <i>abscessus</i>                                        | A                                | A | Complete                      | T | R                                  |
| 72  | <i>M. abscessus/bolletii</i>                                       | R                                   | >32    | <i>M. abscessus</i> subsp. <i>abscessus</i>                                        | A                                | A | Complete                      | T | R                                  |
| 102 | <i>M. abscessus/bolletii</i>                                       | R                                   | >32    | <i>M. abscessus</i> subsp. <i>abscessus</i>                                        | A                                | A | Complete                      | T | R                                  |
| 19  | <i>M. massiliense</i>                                              | S                                   | 0.125  | <i>M. abscessus</i> subsp. <i>massiliense</i>                                      | A                                | A | Truncated                     | T | S                                  |
| 33  | <i>M. massiliense</i>                                              | S                                   | 0.25   | <i>M. abscessus</i> subsp. <i>massiliense</i>                                      | A                                | A | Truncated                     | T | S                                  |
| 44  | <i>M. massiliense</i>                                              | S                                   | <=0.06 | <i>M. abscessus</i> subsp. <i>massiliense</i>                                      | A                                | A | Truncated                     | T | S                                  |
| 90  | <i>M. massiliense</i>                                              | S                                   | 0.25   | <i>M. abscessus</i> subsp. <i>massiliense</i>                                      | A                                | A | Truncated                     | T | S                                  |
| 103 | <i>M. massiliense</i>                                              | S                                   | <=0.06 | <i>M. abscessus</i> subsp. <i>massiliense</i>                                      | A                                | A | Truncated                     | T | S                                  |
| 1   | <i>M. avium</i>                                                    | S                                   | 0.5    | <i>M. avium</i> subsp. <i>hominissuis</i>                                          | A                                | A | None                          |   | S                                  |
| 3   | <i>M. avium</i>                                                    | S                                   | 0.25   | <i>M. avium</i> subsp. <i>hominissuis</i>                                          | A                                | A | None                          |   | S                                  |
| 5   | <i>M. avium</i>                                                    | R                                   | >32    | <i>M. avium</i> subsp. <i>hominissuis</i>                                          | T                                | A | None                          |   | R                                  |
| 6   | <i>M. avium</i>                                                    | S                                   | 0.25   | <i>M. avium</i> subsp. <i>hominissuis</i>                                          | A                                | A | None                          |   | S                                  |
| 9   | <i>M. avium</i>                                                    | R                                   | >32    | <i>M. avium</i> subsp. <i>hominissuis</i>                                          | A                                | C | None                          |   | R                                  |
| 11  | <i>M. avium</i>                                                    | S                                   | 0.25   | <i>M. avium</i> subsp. <i>hominissuis</i>                                          | A                                | A | None                          |   | S                                  |
| 13  | <i>M. avium</i>                                                    | R                                   | >32    | <i>M. avium</i> subsp. <i>hominissuis</i>                                          | C                                | A | None                          |   | R                                  |
| 16  | <i>M. avium</i>                                                    | R                                   | >32    | <i>M. avium</i> subsp. <i>hominissuis</i>                                          | G                                | A | None                          |   | R                                  |

|    |                 |   |       |                                           |   |   |      |   |
|----|-----------------|---|-------|-------------------------------------------|---|---|------|---|
| 21 | <i>M. avium</i> | S | 0.5   | <i>M. avium</i> subsp. <i>hominissuis</i> | A | A | None | S |
| 22 | <i>M. avium</i> | R | >32   | <i>M. avium</i> subsp. <i>hominissuis</i> | A | G | None | R |
| 23 | <i>M. avium</i> | S | 0.5   | <i>M. avium</i> subsp. <i>hominissuis</i> | A | A | None | S |
| 24 | <i>M. avium</i> | S | 0.25  | <i>M. avium</i> subsp. <i>hominissuis</i> | A | A | None | S |
| 25 | <i>M. avium</i> | R | >32   | <i>M. avium</i> subsp. <i>hominissuis</i> | A | A | None | S |
| 26 | <i>M. avium</i> | R | >32   | <i>M. avium</i> subsp. <i>hominissuis</i> | C | A | None | R |
| 27 | <i>M. avium</i> | S | 0.5   | <i>M. avium</i> subsp. <i>hominissuis</i> | A | A | None | S |
| 28 | <i>M. avium</i> | S | 0.5   | <i>M. avium</i> subsp. <i>hominissuis</i> | A | A | None | S |
| 34 | <i>M. avium</i> | S | 0.25  | <i>M. avium</i> subsp. <i>hominissuis</i> | A | A | None | S |
| 35 | <i>M. avium</i> | S | 4     | <i>M. avium</i> subsp. <i>hominissuis</i> | A | A | None | S |
| 36 | <i>M. avium</i> | S | 1     | <i>M. avium</i> subsp. <i>hominissuis</i> | A | A | None | S |
| 37 | <i>M. avium</i> | R | >32   | <i>M. avium</i> subsp. <i>hominissuis</i> | A | C | None | R |
| 38 | <i>M. avium</i> | S | 1     | <i>M. avium</i> subsp. <i>hominissuis</i> | A | A | None | S |
| 40 | <i>M. avium</i> | S | 4     | <i>M. avium</i> subsp. <i>hominissuis</i> | T | A | None | R |
| 41 | <i>M. avium</i> | S | 0.25  | <i>M. avium</i> subsp. <i>hominissuis</i> | A | A | None | S |
| 42 | <i>M. avium</i> | S | 1     | <i>M. avium</i> subsp. <i>hominissuis</i> | A | A | None | S |
| 45 | <i>M. avium</i> | S | 0.125 | <i>M. avium</i> subsp. <i>hominissuis</i> | A | A | None | S |
| 46 | <i>M. avium</i> | S | 2     | <i>M. avium</i> subsp. <i>hominissuis</i> | A | A | None | S |
| 47 | <i>M. avium</i> | S | 0.5   | <i>M. avium</i> subsp. <i>hominissuis</i> | A | A | None | S |
| 48 | <i>M. avium</i> | S | 0.25  | <i>M. avium</i> subsp. <i>hominissuis</i> | A | A | None | S |
| 49 | <i>M. avium</i> | S | 1     | <i>M. avium</i> subsp. <i>hominissuis</i> | A | A | None | S |
| 52 | <i>M. avium</i> | S | 0.25  | <i>M. avium</i> subsp. <i>hominissuis</i> | A | A | None | S |
| 54 | <i>M. avium</i> | S | 4     | <i>M. avium</i> subsp. <i>hominissuis</i> | A | A | None | S |

|    |                 |   |       |                                           |   |   |      |   |
|----|-----------------|---|-------|-------------------------------------------|---|---|------|---|
| 55 | <i>M. avium</i> | S | 0.25  | <i>M. avium</i> subsp. <i>hominissuis</i> | A | A | None | S |
| 56 | <i>M. avium</i> | S | 0.5   | <i>M. avium</i> subsp. <i>hominissuis</i> | A | A | None | S |
| 57 | <i>M. avium</i> | S | 2     | <i>M. avium</i> subsp. <i>hominissuis</i> | A | G | None | R |
| 58 | <i>M. avium</i> | S | 0.125 | <i>M. avium</i> subsp. <i>hominissuis</i> | A | A | None | S |
| 60 | <i>M. avium</i> | S | 0.5   | <i>M. avium</i> subsp. <i>hominissuis</i> | A | A | None | S |
| 61 | <i>M. avium</i> | S | 0.25  | <i>M. avium</i> subsp. <i>hominissuis</i> | A | A | None | S |
| 63 | <i>M. avium</i> | S | 2     | <i>M. avium</i> subsp. <i>hominissuis</i> | A | A | None | S |
| 64 | <i>M. avium</i> | S | 0.25  | <i>M. avium</i> subsp. <i>hominissuis</i> | A | A | None | S |
| 65 | <i>M. avium</i> | S | 0.5   | <i>M. avium</i> subsp. <i>hominissuis</i> | A | A | None | S |
| 66 | <i>M. avium</i> | S | 0.5   | <i>M. avium</i> subsp. <i>hominissuis</i> | A | A | None | S |
| 67 | <i>M. avium</i> | S | 0.25  | <i>M. avium</i> subsp. <i>hominissuis</i> | A | A | None | S |
| 68 | <i>M. avium</i> | S | 0.5   | <i>M. avium</i> subsp. <i>hominissuis</i> | A | A | None | S |
| 70 | <i>M. avium</i> | S | 0.25  | <i>M. avium</i> subsp. <i>hominissuis</i> | A | A | None | S |
| 75 | <i>M. avium</i> | S | 0.25  | <i>M. avium</i> subsp. <i>hominissuis</i> | A | A | None | S |
| 77 | <i>M. avium</i> | R | >32   | <i>M. avium</i> subsp. <i>hominissuis</i> | A | C | None | R |
| 79 | <i>M. avium</i> | R | >32   | <i>M. avium</i> subsp. <i>hominissuis</i> | G | A | None | R |
| 81 | <i>M. avium</i> | R | >32   | <i>M. avium</i> subsp. <i>hominissuis</i> | C | A | None | R |
| 82 | <i>M. avium</i> | S | 0.5   | <i>M. avium</i> subsp. <i>hominissuis</i> | A | A | None | S |
| 83 | <i>M. avium</i> | R | >32   | <i>M. avium</i> subsp. <i>hominissuis</i> | G | A | None | R |
| 86 | <i>M. avium</i> | S | 2     | <i>M. avium</i> subsp. <i>hominissuis</i> | A | A | None | S |
| 88 | <i>M. avium</i> | S | 2     | <i>M. avium</i> subsp. <i>hominissuis</i> | A | A | None | S |
| 92 | <i>M. avium</i> | S | 0.125 | <i>M. avium</i> subsp. <i>hominissuis</i> | A | A | None | S |
| 94 | <i>M. avium</i> | S | 2     | <i>M. avium</i> subsp. <i>hominissuis</i> | A | A | None | S |

|     |                          |   |       |                                                       |   |   |      |   |
|-----|--------------------------|---|-------|-------------------------------------------------------|---|---|------|---|
| 97  | <i>M. avium</i>          | S | 0.5   | <i>M. avium</i> subsp. <i>hominissuis</i>             | A | A | None | S |
| 98  | <i>M. avium</i>          | S | 0.5   | <i>M. avium</i> subsp. <i>hominissuis</i>             | A | A | None | S |
| 100 | <i>M. avium</i>          | S | 2     | <i>M. avium</i> subsp. <i>hominissuis</i>             | A | A | None | S |
| 101 | <i>M. avium</i>          | S | 0.25  | <i>M. avium</i> subsp. <i>hominissuis</i>             | A | A | None | S |
| 104 | <i>M. avium</i>          | S | 0.06  | <i>M. avium</i> subsp. <i>hominissuis</i>             | A | A | None | S |
| 105 | <i>M. avium</i>          | R | >32   | <i>M. avium</i> subsp. <i>hominissuis</i>             | C | A | None | R |
| 108 | <i>M. avium</i>          | S | 1     | <i>M. avium</i> subsp. <i>hominissuis</i>             | A | A | None | S |
| 109 | <i>M. avium</i>          | S | 1     | <i>M. avium</i> subsp. <i>hominissuis</i>             | A | A | None | S |
| 111 | <i>M. avium</i>          | S | 0.125 | <i>M. avium</i> subsp. <i>hominissuis</i>             | A | A | None | S |
| 112 | <i>M. avium</i>          | S | 1     | <i>M. avium</i> subsp. <i>hominissuis</i>             | A | A | None | S |
| 113 | <i>M. avium</i>          | S | 2     | <i>M. avium</i> subsp. <i>hominissuis</i>             | A | A | None | S |
| 114 | <i>M. avium</i>          | I | 16    | <i>M. avium</i> subsp. <i>hominissuis</i>             | A | A | None | S |
| 115 | <i>M. avium</i>          | S | 0.25  | <i>M. avium</i> subsp. <i>hominissuis</i>             | A | A | None | S |
| 116 | <i>M. avium</i>          | S | 1     | <i>M. avium</i> subsp. <i>hominissuis</i>             | A | A | None | S |
| 2   | <i>M. intracellulare</i> | S | 0.25  | <i>M. intracellulare</i> subsp. <i>intracellulare</i> | A | A | None | S |
| 4   | <i>M. intracellulare</i> | S | 0.25  | <i>M. intracellulare</i> subsp. <i>intracellulare</i> | A | A | None | S |
| 7   | <i>M. intracellulare</i> | S | 0.25  | <i>M. intracellulare</i> subsp. <i>intracellulare</i> | A | A | None | S |
| 12  | <i>M. intracellulare</i> | R | >32   | <i>M. intracellulare</i> subsp. <i>intracellulare</i> | C | A | None | R |
| 14  | <i>M. intracellulare</i> | S | 0.125 | <i>M. intracellulare</i> subsp. <i>intracellulare</i> | A | A | None | S |
| 15  | <i>M. intracellulare</i> | S | 0.125 | <i>M. intracellulare</i> subsp. <i>intracellulare</i> | A | A | None | S |
| 20  | <i>M. intracellulare</i> | I | 16    | <i>M. intracellulare</i> subsp. <i>intracellulare</i> | A | A | None | S |



|     |                          |   |       |                                         |        |   |   |      |   |
|-----|--------------------------|---|-------|-----------------------------------------|--------|---|---|------|---|
| 29  | <i>M. intracellulare</i> | R | 32    | <i>M. intracellulare intracellulare</i> | subsp. | A | G | None | R |
| 30  | <i>M. intracellulare</i> | S | 0.125 | <i>M. intracellulare intracellulare</i> | subsp. | A | A | None | S |
| 31  | <i>M. intracellulare</i> | S | 0.25  | <i>M. intracellulare intracellulare</i> | subsp. | A | A | None | S |
| 39  | <i>M. intracellulare</i> | S | 0.125 | <i>M. intracellulare intracellulare</i> | subsp. | A | A | None | S |
| 50  | <i>M. intracellulare</i> | S | 0.125 | <i>M. intracellulare intracellulare</i> | subsp. | A | A | None | S |
| 51  | <i>M. intracellulare</i> | S | 1     | <i>M. intracellulare intracellulare</i> | subsp. | A | A | None | S |
| 59  | <i>M. intracellulare</i> | S | 0.25  | <i>M. intracellulare intracellulare</i> | subsp. | A | A | None | S |
| 76  | <i>M. intracellulare</i> | S | 0.25  | <i>M. intracellulare intracellulare</i> | subsp. | A | A | None | S |
| 78  | <i>M. intracellulare</i> | S | 0.25  | <i>M. intracellulare intracellulare</i> | subsp. | A | A | None | S |
| 80  | <i>M. intracellulare</i> | S | 1     | <i>M. intracellulare intracellulare</i> | subsp. | A | A | None | S |
| 84  | <i>M. intracellulare</i> | S | 0.5   | <i>M. intracellulare intracellulare</i> | subsp. | A | A | None | S |
| 87  | <i>M. intracellulare</i> | S | 0.06  | <i>M. intracellulare intracellulare</i> | subsp. | A | A | None | S |
| 89  | <i>M. intracellulare</i> | S | 0.25  | <i>M. intracellulare intracellulare</i> | subsp. | A | A | None | S |
| 91  | <i>M. intracellulare</i> | S | 0.125 | <i>M. intracellulare intracellulare</i> | subsp. | A | A | None | S |
| 95  | <i>M. intracellulare</i> | S | 0.06  | <i>M. intracellulare intracellulare</i> | subsp. | A | A | None | S |
| 96  | <i>M. intracellulare</i> | S | 0.25  | <i>M. intracellulare intracellulare</i> | subsp. | A | A | None | S |
| 107 | <i>M. intracellulare</i> | S | 1     | <i>M. intracellulare intracellulare</i> | subsp. | A | A | None | S |

|     |                            |      |     |                                                       |   |   |      |      |
|-----|----------------------------|------|-----|-------------------------------------------------------|---|---|------|------|
| 110 | <i>M. intracellulare</i>   | R    | >32 | <i>M. intracellulare</i> subsp. <i>intracellulare</i> | C | A | None | R    |
| 8   | <i>M. intracellulare</i>   | R    | >32 | <i>M. intracellulare</i> subsp. <i>chimaera</i>       | A | C | None | R    |
| 10  | <i>M. intracellulare</i>   | S    | 2   | <i>M. intracellulare</i> subsp. <i>chimaera</i>       | A | A | None | S    |
| 17  | <i>M. kansasii</i>         | N.A. |     | <i>M. kansasii</i>                                    | A | A | None | N.A. |
| 43  | <i>M. paragordoniae</i>    | N.A. |     | <i>M. paragordoniae</i>                               | A | A | None | N.A. |
| 85  | <i>M. gordonae</i>         | N.A. |     | <i>M. paragordoniae</i>                               | A | A | None | N.A. |
| 93  | Unidentified               | N.A. |     | <i>M. paragordoniae</i>                               | A | A | None | N.A. |
| 18  | <i>M.lentiflavum</i>       | N.A. |     | <i>M. lentiflavum</i>                                 | A | A | None | N.A. |
| 62  | <i>M.lentiflavum</i>       | N.A. |     | <i>M. lentiflavum</i>                                 | A | A | None | N.A. |
| 53  | Unidentified               | N.A. |     | <i>M. gordonae</i>                                    | A | A | None | N.A. |
| 73  | <i>M.fortuitum complex</i> | N.A. |     | <i>M. fortuitum</i> subsp. <i>fortuitum</i>           | A | A | None | N.A. |
| 74  | <i>M.peregrinum</i>        | N.A. |     | <i>M.peregrinum</i>                                   | A | A | None | N.A. |
| 106 | <i>M.peregrinum</i>        | N.A. |     | <i>M.peregrinum</i>                                   | A | A | None | N.A. |
| 99  | <i>M.chelonae</i>          | N.A. |     | <i>M.chelonae</i>                                     | A | A | None | N.A. |
| 69  | <i>M.fortuitum complex</i> | N.A. |     | <i>M.porcinum</i>                                     | A | A | None | N.A. |
| 71  | Unidentified               | N.A. |     | <i>M.szulgai</i>                                      | A | A | None | N.A. |

TRC, transcription-reverse transcription concerted reaction; MALDI-TOF MS, Matrix-assisted laser desorption ionization-time of flight mass spectrometry; PCR, polymerase chain reaction; R, resistant; S, susceptible; *M. abscessus*, *mycobacterium abscessus*; subsp, subspecies; N.A., not applicable.

Table S6. Efficacy of amikacin resistance prediction by MGIT-seq in comparison of drug susceptibility tests.

| No. | <i>MLST</i> verse                             | Drug susceptibility test |     | Amikacin resistance prediction by MinION |                                         |
|-----|-----------------------------------------------|--------------------------|-----|------------------------------------------|-----------------------------------------|
|     |                                               | AMK                      | MIC | <i>rrs</i> position<br>1408              | Predicted<br>amikacin<br>susceptibility |
| 32  | <i>M. abscessus</i> subsp. <i>abscessus</i>   | S                        | 8   | A                                        | S                                       |
| 72  | <i>M. abscessus</i> subsp. <i>abscessus</i>   | S                        | 1   | A                                        | S                                       |
| 102 | <i>M. abscessus</i> subsp. <i>abscessus</i>   | S                        | 4   | A                                        | S                                       |
| 19  | <i>M. abscessus</i> subsp. <i>massiliense</i> | S                        | 2   | A                                        | S                                       |
| 33  | <i>M. abscessus</i> subsp. <i>massiliense</i> | S                        | 8   | A                                        | S                                       |
| 44  | <i>M. abscessus</i> subsp. <i>massiliense</i> | S                        | 0.5 | A                                        | S                                       |
| 90  | <i>M. abscessus</i> subsp. <i>massiliense</i> | S                        | 16  | A                                        | S                                       |
| 103 | <i>M. abscessus</i> subsp. <i>massiliense</i> | S                        | 0.5 | A                                        | S                                       |
| 1   | <i>M. avium</i> subsp. <i>hominissuis</i>     | S                        | 16  | A                                        | S                                       |
| 3   | <i>M. avium</i> subsp. <i>hominissuis</i>     | S                        | 16  | A                                        | S                                       |
| 5   | <i>M. avium</i> subsp. <i>hominissuis</i>     | I                        | 32  | A                                        | S                                       |
| 6   | <i>M. avium</i> subsp. <i>hominissuis</i>     | R                        | 64  | A                                        | S                                       |
| 9   | <i>M. avium</i> subsp. <i>hominissuis</i>     | S                        | 2   | A                                        | S                                       |
| 11  | <i>M. avium</i> subsp. <i>hominissuis</i>     | S                        | 16  | A                                        | S                                       |
| 13  | <i>M. avium</i> subsp. <i>hominissuis</i>     | S                        | 16  | A                                        | S                                       |
| 16  | <i>M. avium</i> subsp. <i>hominissuis</i>     | S                        | 2   | A                                        | S                                       |
| 21  | <i>M. avium</i> subsp. <i>hominissuis</i>     | S                        | 8   | A                                        | S                                       |
| 22  | <i>M. avium</i> subsp. <i>hominissuis</i>     | S                        | 16  | A                                        | S                                       |
| 23  | <i>M. avium</i> subsp. <i>hominissuis</i>     | S                        | 16  | A                                        | S                                       |

|    |                                           |   |    |   |   |
|----|-------------------------------------------|---|----|---|---|
| 24 | <i>M. avium</i> subsp. <i>hominissuis</i> | S | 16 | A | S |
| 25 | <i>M. avium</i> subsp. <i>hominissuis</i> | S | 4  | A | S |
| 26 | <i>M. avium</i> subsp. <i>hominissuis</i> | S | 16 | A | S |
| 27 | <i>M. avium</i> subsp. <i>hominissuis</i> | S | 16 | A | S |
| 28 | <i>M. avium</i> subsp. <i>hominissuis</i> | S | 8  | A | S |
| 34 | <i>M. avium</i> subsp. <i>hominissuis</i> | S | 8  | A | S |
| 35 | <i>M. avium</i> subsp. <i>hominissuis</i> | S | 8  | A | S |
| 36 | <i>M. avium</i> subsp. <i>hominissuis</i> | S | 8  | A | S |
| 37 | <i>M. avium</i> subsp. <i>hominissuis</i> | I | 32 | A | S |
| 38 | <i>M. avium</i> subsp. <i>hominissuis</i> | S | 16 | A | S |
| 40 | <i>M. avium</i> subsp. <i>hominissuis</i> | S | 4  | A | S |
| 41 | <i>M. avium</i> subsp. <i>hominissuis</i> | S | 16 | A | S |
| 42 | <i>M. avium</i> subsp. <i>hominissuis</i> | S | 8  | A | S |
| 45 | <i>M. avium</i> subsp. <i>hominissuis</i> | S | 16 | A | S |
| 46 | <i>M. avium</i> subsp. <i>hominissuis</i> | S | 16 | A | S |
| 47 | <i>M. avium</i> subsp. <i>hominissuis</i> | S | 4  | A | S |
| 48 | <i>M. avium</i> subsp. <i>hominissuis</i> | S | 16 | A | S |
| 49 | <i>M. avium</i> subsp. <i>hominissuis</i> | S | 8  | A | S |
| 52 | <i>M. avium</i> subsp. <i>hominissuis</i> | S | 4  | A | S |
| 54 | <i>M. avium</i> subsp. <i>hominissuis</i> | S | 8  | A | S |
| 55 | <i>M. avium</i> subsp. <i>hominissuis</i> | S | 8  | A | S |
| 56 | <i>M. avium</i> subsp. <i>hominissuis</i> | S | 16 | A | S |
| 57 | <i>M. avium</i> subsp. <i>hominissuis</i> | S | 8  | A | S |

|     |                                           |   |      |   |   |
|-----|-------------------------------------------|---|------|---|---|
| 58  | <i>M. avium</i> subsp. <i>hominissuis</i> | S | 8    | A | S |
| 60  | <i>M. avium</i> subsp. <i>hominissuis</i> | S | 8    | A | S |
| 61  | <i>M. avium</i> subsp. <i>hominissuis</i> | S | 16   | A | S |
| 63  | <i>M. avium</i> subsp. <i>hominissuis</i> | S | 16   | A | S |
| 64  | <i>M. avium</i> subsp. <i>hominissuis</i> | S | 4    | A | S |
| 65  | <i>M. avium</i> subsp. <i>hominissuis</i> | S | 16   | A | S |
| 66  | <i>M. avium</i> subsp. <i>hominissuis</i> | S | 16   | A | S |
| 67  | <i>M. avium</i> subsp. <i>hominissuis</i> | S | 2    | A | S |
| 68  | <i>M. avium</i> subsp. <i>hominissuis</i> | S | 8    | A | S |
| 70  | <i>M. avium</i> subsp. <i>hominissuis</i> | S | 4    | A | S |
| 75  | <i>M. avium</i> subsp. <i>hominissuis</i> | S | 8    | A | S |
| 77  | <i>M. avium</i> subsp. <i>hominissuis</i> | S | 4    | A | S |
| 79  | <i>M. avium</i> subsp. <i>hominissuis</i> | R | >256 | G | R |
| 81  | <i>M. avium</i> subsp. <i>hominissuis</i> | S | 8    | A | S |
| 82  | <i>M. avium</i> subsp. <i>hominissuis</i> | S | 16   | A | S |
| 83  | <i>M. avium</i> subsp. <i>hominissuis</i> | S | 8    | A | S |
| 86  | <i>M. avium</i> subsp. <i>hominissuis</i> | S | 1    | A | S |
| 88  | <i>M. avium</i> subsp. <i>hominissuis</i> | S | 8    | A | S |
| 92  | <i>M. avium</i> subsp. <i>hominissuis</i> | S | 8    | A | S |
| 94  | <i>M. avium</i> subsp. <i>hominissuis</i> | S | 1    | A | S |
| 97  | <i>M. avium</i> subsp. <i>hominissuis</i> | S | 8    | A | S |
| 98  | <i>M. avium</i> subsp. <i>hominissuis</i> | S | 4    | A | S |
| 100 | <i>M. avium</i> subsp. <i>hominissuis</i> | S | 4    | A | S |

|     |                                                       |   |    |   |   |
|-----|-------------------------------------------------------|---|----|---|---|
| 101 | <i>M. avium</i> subsp. <i>hominissuis</i>             | S | 16 | A | S |
| 104 | <i>M. avium</i> subsp. <i>hominissuis</i>             | S | 8  | A | S |
| 105 | <i>M. avium</i> subsp. <i>hominissuis</i>             | S | 8  | A | S |
| 108 | <i>M. avium</i> subsp. <i>hominissuis</i>             | S | 4  | A | S |
| 109 | <i>M. avium</i> subsp. <i>hominissuis</i>             | S | 8  | A | S |
| 111 | <i>M. avium</i> subsp. <i>hominissuis</i>             | S | 4  | A | S |
| 112 | <i>M. avium</i> subsp. <i>hominissuis</i>             | S | 8  | A | S |
| 113 | <i>M. avium</i> subsp. <i>hominissuis</i>             | S | 8  | A | S |
| 114 | <i>M. avium</i> subsp. <i>hominissuis</i>             | S | 4  | A | S |
| 115 | <i>M. avium</i> subsp. <i>hominissuis</i>             | I | 32 | A | S |
| 116 | <i>M. avium</i> subsp. <i>hominissuis</i>             | S | 2  | A | S |
| 2   | <i>M. intracellulare</i> subsp. <i>intracellulare</i> | S | 8  | A | S |
| 4   | <i>M. intracellulare</i> subsp. <i>intracellulare</i> | S | 4  | A | S |
| 7   | <i>M. intracellulare</i> subsp. <i>intracellulare</i> | S | 4  | A | S |
| 12  | <i>M. intracellulare</i> subsp. <i>intracellulare</i> | S | 2  | A | S |
| 14  | <i>M. intracellulare</i> subsp. <i>intracellulare</i> | S | 8  | A | S |
| 15  | <i>M. intracellulare</i> subsp. <i>intracellulare</i> | S | 8  | A | S |
| 20  | <i>M. intracellulare</i> subsp. <i>intracellulare</i> | S | 4  | A | S |
| 29  | <i>M. intracellulare</i> subsp. <i>intracellulare</i> | S | 8  | A | S |
| 30  | <i>M. intracellulare</i> subsp. <i>intracellulare</i> | S | 4  | A | S |
| 31  | <i>M. intracellulare</i> subsp. <i>intracellulare</i> | S | 4  | A | S |
| 39  | <i>M. intracellulare</i> subsp. <i>intracellulare</i> | S | 4  | A | S |
| 50  | <i>M. intracellulare</i> subsp. <i>intracellulare</i> | S | 4  | A | S |

|     |                                                       |      |   |   |   |
|-----|-------------------------------------------------------|------|---|---|---|
| 51  | <i>M. intracellulare</i> subsp. <i>intracellulare</i> | S    | 8 | A | S |
| 59  | <i>M. intracellulare</i> subsp. <i>intracellulare</i> | S    | 8 | A | S |
| 76  | <i>M. intracellulare</i> subsp. <i>intracellulare</i> | S    | 8 | A | S |
| 78  | <i>M. intracellulare</i> subsp. <i>intracellulare</i> | S    | 8 | A | S |
| 80  | <i>M. intracellulare</i> subsp. <i>intracellulare</i> | S    | 8 | A | S |
| 84  | <i>M. intracellulare</i> subsp. <i>intracellulare</i> | S    | 8 | A | S |
| 87  | <i>M. intracellulare</i> subsp. <i>intracellulare</i> | S    | 2 | A | S |
| 89  | <i>M. intracellulare</i> subsp. <i>intracellulare</i> | S    | 4 | A | S |
| 91  | <i>M. intracellulare</i> subsp. <i>intracellulare</i> | S    | 2 | A | S |
| 95  | <i>M. intracellulare</i> subsp. <i>intracellulare</i> | S    | 2 | A | S |
| 96  | <i>M. intracellulare</i> subsp. <i>intracellulare</i> | S    | 4 | A | S |
| 107 | <i>M. intracellulare</i> subsp. <i>intracellulare</i> | S    | 4 | A | S |
| 110 | <i>M. intracellulare</i> subsp. <i>intracellulare</i> | S    | 4 | A | S |
| 8   | <i>M. intracellulare</i> subsp. <i>chimaera</i>       | S    | 8 | A | S |
| 10  | <i>M. intracellulare</i> subsp. <i>chimaera</i>       | S    | 8 | A | S |
| 17  | <i>M. kansasii</i>                                    | N.A. |   |   |   |
| 43  | <i>M. paragordoniae</i>                               | N.A. |   |   |   |
| 85  | <i>M. paragordoniae</i>                               | N.A. |   |   |   |
| 93  | <i>M. paragordoniae</i>                               | N.A. |   |   |   |
| 18  | <i>M. lentiflavum</i>                                 | N.A. |   |   |   |
| 62  | <i>M. lentiflavum</i>                                 | N.A. |   |   |   |
| 53  | <i>M. gordonae</i>                                    | N.A. |   |   |   |
| 73  | <i>M. fortuitum</i> subsp. <i>fortuitum</i>           | N.A. |   |   |   |

|     |                     |      |
|-----|---------------------|------|
| 74  | <i>M.peregrinum</i> | N.A. |
| 106 | <i>M.peregrinum</i> | N.A. |
| 99  | <i>M.chelonae</i>   | N.A. |
| 69  | <i>M.porcinum</i>   | N.A. |
| 71  | <i>M.szulgai</i>    | N.A. |

---

TRC, transcription-reverse transcription concerted reaction; MALDI-TOF MS, Matrix-assisted laser desorption ionization-time of flight mass spectrometry; PCR, polymerase chain reaction; R, resistant; I, intermediate; S, susceptible; *M. abscessus*, *mycobacterium abscessus*; subsp, subspecies; N.A., not applicable.



Table S7. Costs for direct MGIT sequence

Cost for Library preparation

| Item                                                | Cost    | Consumption |         |            | Total | Additional Information<br>Product                                   |
|-----------------------------------------------------|---------|-------------|---------|------------|-------|---------------------------------------------------------------------|
|                                                     |         | DNA         | Library | Sequencing |       |                                                                     |
| P1000 pipette tips                                  | \$0.20  |             |         | 2          | 2     | One Touch Filter tips 1000 µL                                       |
| P200 pipette tips                                   | \$0.80  | 4           | 2       | 4          | 10    | One Touch Filter tips 200 µL                                        |
| P10 pipette tips                                    | \$0.48  | 2           | 3       | 1          | 6     | One Touch Filter tips 10 µL                                         |
| 1.5 ml Eppendorf DNA LoBind tubes                   | \$0.27  | 1           | 3       |            | 4     | DNA LoBind Tubes                                                    |
| 0.2 ml thin-walled PCR tubes                        | \$1.33  |             | 1       |            | 1     | 0.2ml 8-Tube (q)PCR Strips, with Single Attached Caps, High Profile |
| Nuclease-free water                                 | \$0.001 |             | 20uL    | 4.5uL      | 25uL  | DISTILLED WATER                                                     |
| Freshly prepared 70% ethanol in nuclease-free water | \$0.010 |             | 500uL   |            | 500uL | 99.5% Ethanol                                                       |
| 10 mM Tris-HCl pH 8.0 with 50 mM NaCl               | \$0.002 |             | 10uL    |            | 10uL  | 1M Tris-HCl (pH 8.0)                                                |
| Glass beads                                         | \$2.27  | 1           |         |            | 1     | MN Bead Tubes Type B                                                |
| Qubit dsDNA HS Assay                                | \$1.36  | 1           | 1       |            | 2     | Qubit dsDNA HS Assay Kit, 500 assays                                |
| Agencourt AMPure XP beads                           | \$0.53  |             | 30uL    |            | 30uL  | Agencourt AMPure XP                                                 |
| LongAmp Taq 2X Master Mix (e.g. NEB M0287)          | \$1.15  |             | 25uL    |            | 25uL  | LongAmp Taq 2X Master Mix                                           |
| Cost/sample for Library preparation                 | \$8.40  |             |         |            |       |                                                                     |

Total cost for sequencing run

| Item                                 | Cost    |
|--------------------------------------|---------|
| 12 Prepared Libraries                | \$100.8 |
| Rapid PCR Barcoding Kit (SQK-RPB004) | \$108.3 |
| Flow Cell (R9.4.1)                   | \$500   |
| Total cost / sample                  | \$59.1  |

MGIT, mycobacterial growth indicator tube; PCR, polymerase chain reaction.
